# Supplementary material for: Dissecting the pathways coordinating patterning and growth by plant boundary domains
Source: PubMed Central journal article supplement (PMC6363235; doi:10.1371/journal.pgen.1007913), 2019-01-24

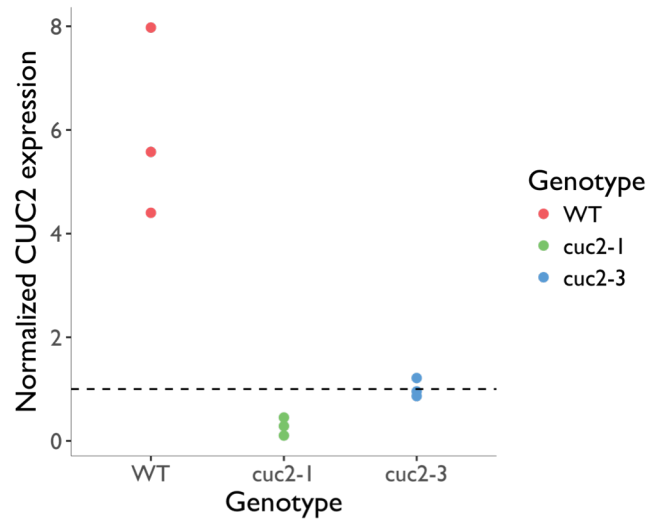

Supplement: pgen.1007913.s001.pdf [file pgen.1007913.s001.pdf]
