# Supplementary material for: Dissecting the pathways coordinating patterning and growth by plant boundary domains
Source: PubMed Central journal article supplement (PMC6363235; doi:10.1371/journal.pgen.1007913), 2019-01-24

**A** *CUC2i* DII-VENUS

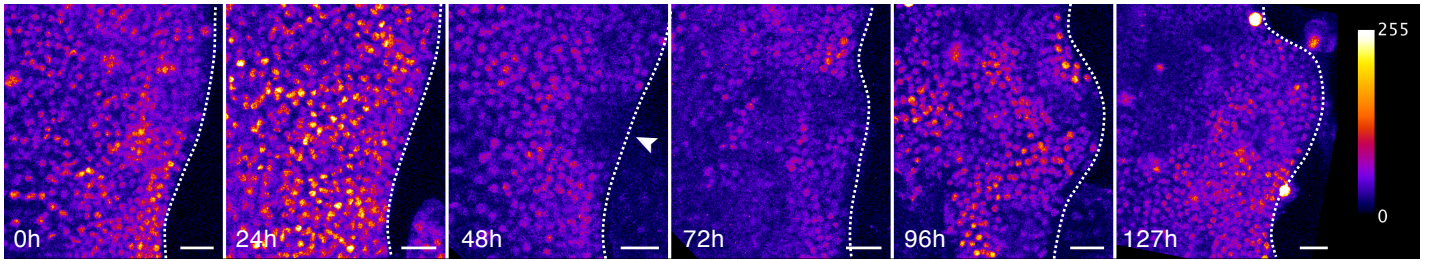

**B** *CUC2i* mDII-VENUS

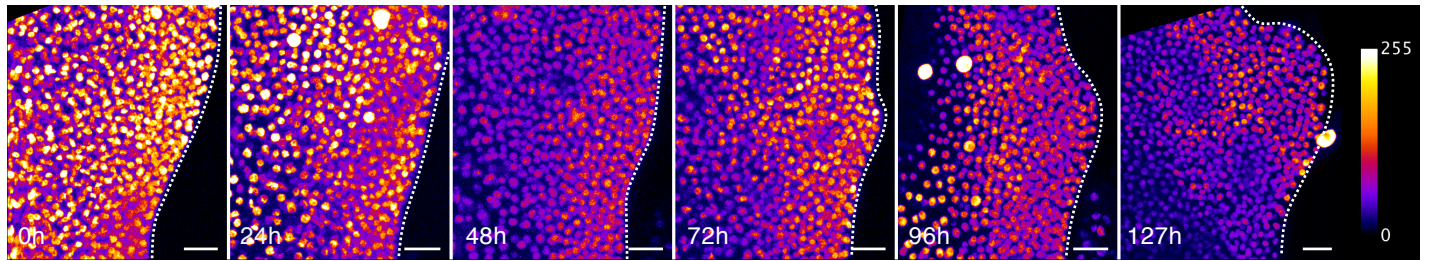

**C** WT *mir164a-4* *CUC2g-m4* *ago1-27*

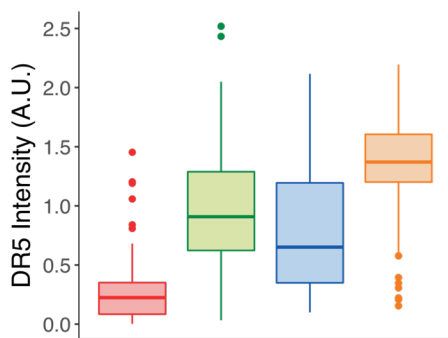

**D** Mock NPA 10 $\mu$ M

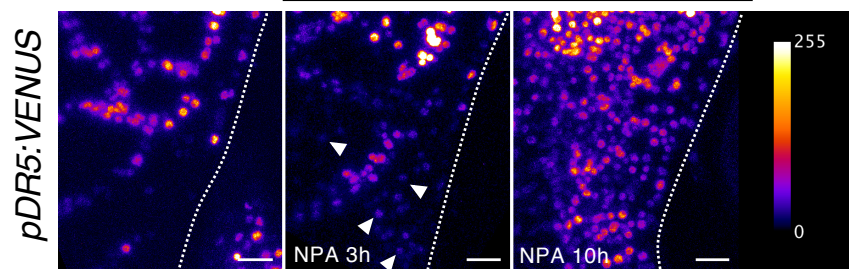

**E** Mock NPA @24h @48h

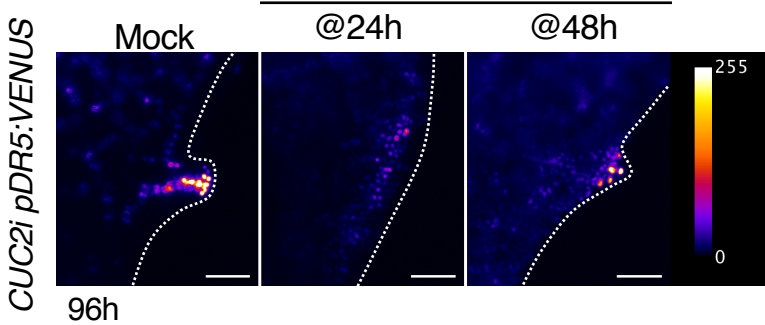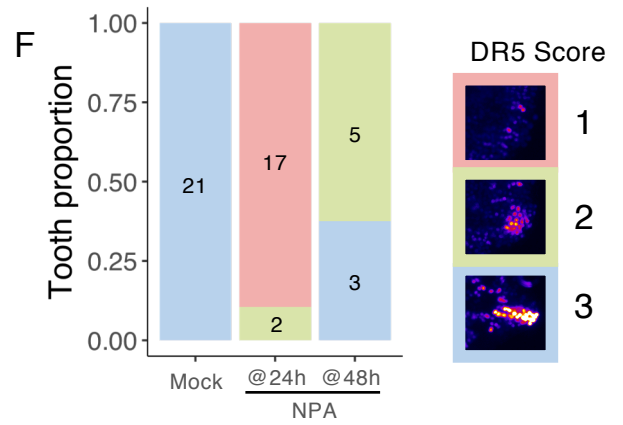

**G** Mock NPA @48h @+72h @+96h

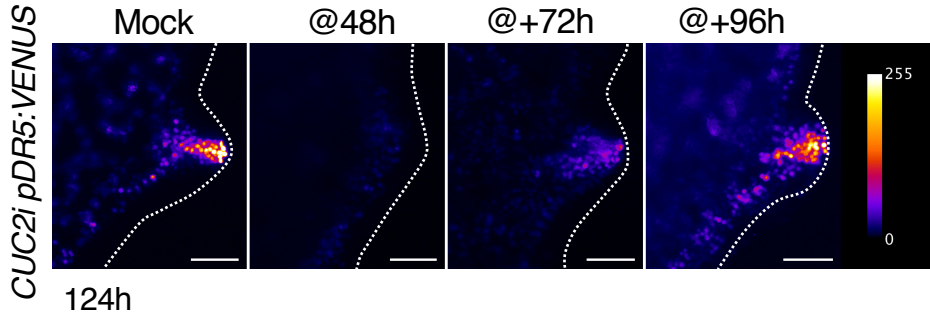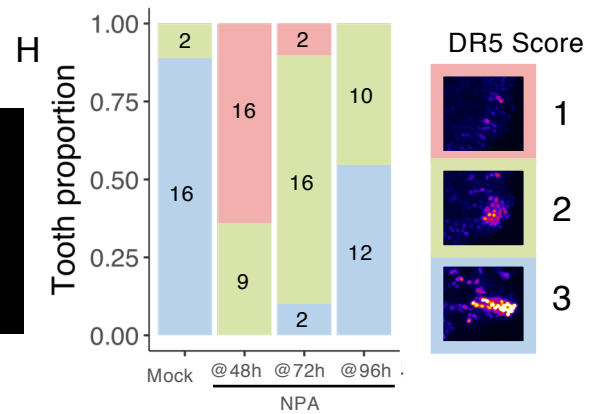

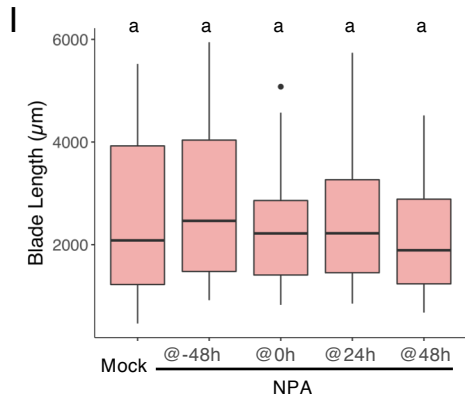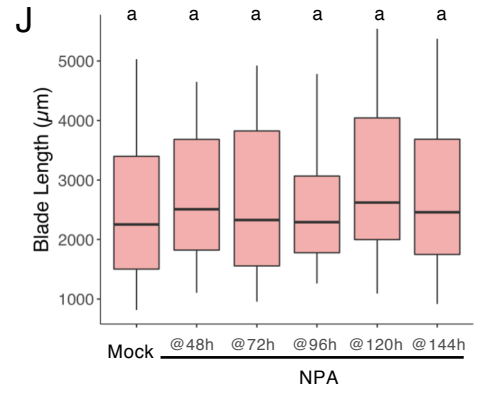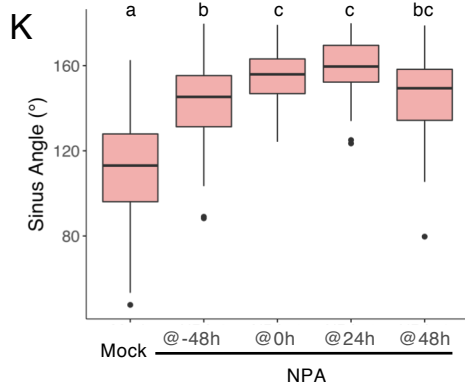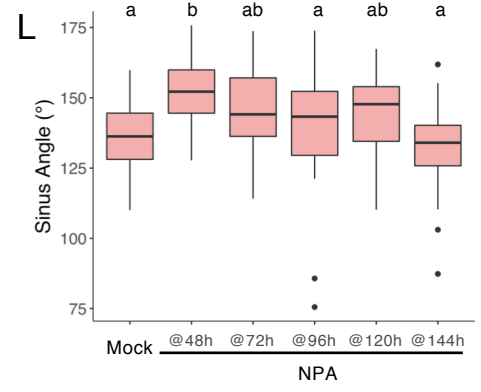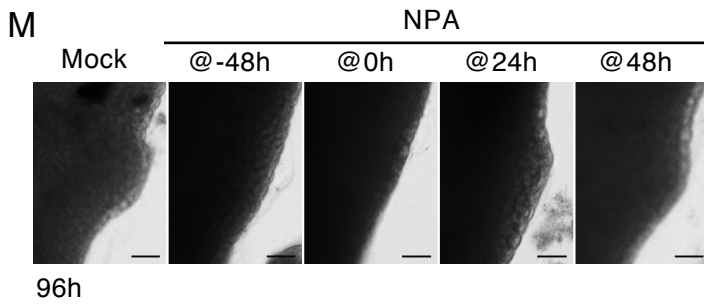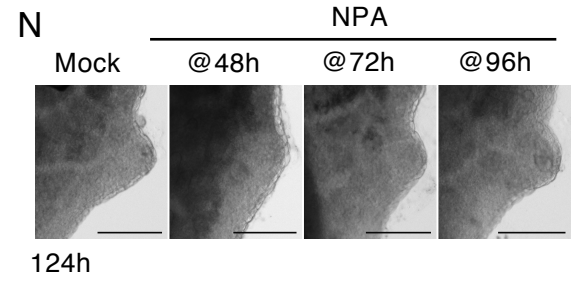

Supplement: pgen.1007913.s005.pdf [file pgen.1007913.s005.pdf]
