# Supplementary material for: Dissecting the pathways coordinating patterning and growth by plant boundary domains
Source: PubMed Central journal article supplement (PMC6363235; doi:10.1371/journal.pgen.1007913), 2019-01-24
Supplement: pgen.1007913.s008.pdf [file pgen.1007913.s008.pdf]

| Reporter                     | Detector type | Excitation wavelength (nm) | Detection wavelength (nm) |
|------------------------------|---------------|----------------------------|---------------------------|
| pCUC2:CUC2-VENUS             | Hybrid        | 514                        | 530-580                   |
| RFP-CUC2                     | Hybrid        | 561                        | 590-631                   |
| pCUC3:CFP                    | Hybrid        | 458                        | 470-512                   |
| pKLUH:GFP,<br>pPIN1:PIN1-GFP | Hybrid        | 488                        | 498-535                   |
| DII-VENUS                    | Hybrid        | 514                        | 520-555                   |
| mDII-VENUS,<br>pDR5:VENUS    | PMT           | 514                        | 520-555                   |
