# Supplementary material for: Dissecting the pathways coordinating patterning and growth by plant boundary domains
Source: PubMed Central journal article supplement (PMC6363235; doi:10.1371/journal.pgen.1007913), 2019-01-24
Supplement: pgen.1007913.s009.pdf [file pgen.1007913.s009.pdf]

| Primer Name | Sequence (5'-3')           | Reference                |
|-------------|----------------------------|--------------------------|
| qEF1a-F     | CCTTGGTGTCAAGCAGATGATC     |                          |
| qEF1a-R     | GATTTTGTCTGGGGTTGTAACCAAC  |                          |
| qREF-F      | AACTCTATGCAGCATTTGATCCACT  | (Morineau, et al., 2016) |
| qREF-R      | TGATTGCATATCTTTATCGCCATC   | (Morineau, et al., 2016) |
| qCUC2-F     | CTTGGCAACTTCCCAGGAGA       | (Tian, et al., 2014)     |
| qCUC2-R     | CCAGCCTCAGTTGCTCTGTTAGTT   | (Tian, et al., 2014)     |
| qCUC3-F     | GGCGGAGGAGGACAGCTTGTT      |                          |
| qCUC3-R     | TGAGGCCACGTGGAGCCCTA       |                          |
| qKLUH-F     | GGTGTAGAGCTTTGGTCTCTGAAG   |                          |
| qKLUH-R     | GATTATTACCCTTCTTCATCTTGTTG |                          |

Morineau C, Gissot L, Bellec Y, Hematy K, Tellier F, Renne C, et al. Dual Fatty Acid Elongase Complex Interactions in Arabidopsis. PLoS ONE. 2016;11(9):e0160631. doi: 10.1371/journal.pone.0160631.

Tian C, Zhang X, He J, Yu H, Wang Y, Shi B, et al. An organ boundary-enriched gene regulatory network uncovers regulatory hierarchies underlying axillary meristem initiation. Mol Syst Biol. 2014;10:755. doi: 10.15252/msb.20145470.
