# Supplementary material for: Dissecting the pathways coordinating patterning and growth by plant boundary domains
Source: PLoS Genet. 2019 Jan 24;15(1):e1007913. doi: 10.1371/journal.pgen.1007913 (PMC6363235; doi:10.1371/journal.pgen.1007913)
Supplement: S2 File — (XLSX) [file pgen.1007913.s011.xlsx]

## Sheet: FigS1
Technical_Rep	Target	Sample	Genotype	Ct	CtqREF	CtEF1
1	CUC2	1	WT	26.73	22.6	15.39
2	CUC2	1	WT	26.68	21.86	15.16
3	CUC2	1	WT	26.53	23.47	14.81
1	CUC2	1	cuc2-1	31.01	21.49	17.26
2	CUC2	1	cuc2-1	31.39	20.83	17.19
3	CUC2	1	cuc2-1	31.55	20.02	17.04
1	CUC2	1	cuc2-3	29.22	21.74	16.1
2	CUC2	1	cuc2-3	29.19	21.51	16.08
3	CUC2	1	cuc2-3	28.17	21.38	15.56
1	CUC2	2	WT	26.74	20.9	16.6
2	CUC2	2	WT	26.6	20.11	16.12
3	CUC2	2	WT	26.52	19.93	15.85
1	CUC2	2	cuc2-1	32.36	21.92	15.62
2	CUC2	2	cuc2-1	32.08	21.85	15.07
3	CUC2	2	cuc2-1	31.91	21.93	14.79
1	CUC2	2	cuc2-3	30.25	21.69	16.59
2	CUC2	2	cuc2-3	29.28	21.2	16.53
3	CUC2	2	cuc2-3	29.01	20.83	16.16
1	CUC2	3	WT	26.22	21.25	16.64
2	CUC2	3	WT	26.32	21.11	16.46
3	CUC2	3	WT	26.44	20.87	16.67
1	CUC2	3	cuc2-1	31.33	22.85	16.45
2	CUC2	3	cuc2-1	31.12	23.52	16.1
3	CUC2	3	cuc2-1	30.61	22.63	15.78
1	CUC2	3	cuc2-3	29.61	21.7	16.17
2	CUC2	3	cuc2-3	30.04	21.84	16.05
3	CUC2	3	cuc2-3	28.9	22.45	16.12

## Sheet: FigS2B
Leaf_Rank	Induction_Time	MeanBladeLengthT0	SDBladeLengthT0	MeanTeethNumber	SDTeethNumber
L10	06h	1412.5	181.698	0	0
L11	06h	1029.5	172.486	0.857143	0.899735
L12	06h	714.125	117.34	2.5	0.755929
L13	06h	485	85.425	3.25	0.707107
L14	06h	391.5	65.5722	3.375	0.517549

## Sheet: FigS2C
InductionTime	MeanToothNb3MostDissectedLeaf
00h	0
00h	0
00h	0
00h	0
00h	0
00h	0
00h	0
00h	0
00h	0
00h	0
00h	0
00h	0
14h	2
14h	3.66667
14h	3
14h	3
14h	4
14h	3.33333
14h	3.33333
14h	3
14h	4.33333
14h	3.33333
14h	3
14h	2
01h	0
01h	0
01h	0
01h	0
01h	0
01h	0
01h	0
01h	0
01h	0
01h	0
01h	0
01h	0
24h	4
24h	3.66667
24h	3.33333
24h	3.66667
24h	4
24h	3.33333
24h	4.33333
24h	3.33333
24h	4.66667
24h	4.33333
24h	3
24h	4.33333
02h	0
02h	0.333333
02h	2.33333
02h	1.33333
02h	1
02h	0
02h	0
02h	1
02h	0
02h	2
02h	0
02h	2.33333
48h	4.33333
48h	4.66667
48h	3.66667
48h	3.66667
48h	4.33333
48h	4.33333
48h	4.33333
48h	5.33333
48h	4.66667
48h	4.33333
48h	4.33333
48h	4.66667
04h	2.66667
04h	2.66667
04h	1.33333
04h	2.33333
04h	2
04h	2.33333
04h	3
04h	2
04h	3
04h	2.66667
04h	2.33333
04h	3.33333
08h	1.66667
08h	2
08h	2
08h	1.33333
08h	2.33333
08h	2.33333
08h	2.33333
08h	2
08h	3
08h	3.33333
08h	2.66667
08h	3

## Sheet: FigS2E
Technical_Rep	Target	Biological_Rep	Genotype	Induction_Time	Ct	CtqREF	CtEF1
1	CUC2	1	CUC2i	NI	34.54	27.33	22.59
2	CUC2	1	CUC2i	NI	NA	27.44	23.34
3	CUC2	1	CUC2i	NI	NA	27.02	22.79
1	CUC2	1	CUC2i	24h	28.08	27.94	23.13
2	CUC2	1	CUC2i	24h	27.73	27.25	23.07
3	CUC2	1	CUC2i	24h	27.67	28.36	23.14
1	CUC2	1	cuc2-1	NI	NA	27.86	22.96
2	CUC2	1	cuc2-1	NI	NA	27.67	22.89
3	CUC2	1	cuc2-1	NI	NA	27.46	22.84
1	CUC2	1	CUC2i	48h	29.78	28.2	23.2
2	CUC2	1	CUC2i	48h	29.88	28	23.04
3	CUC2	1	CUC2i	48h	28.76	28.28	23.03
1	CUC2	1	WT	NI	33.1	28.84	24.29
2	CUC2	1	WT	NI	32.67	28.82	24.16
3	CUC2	1	WT	NI	32.9	28.94	24.17
1	CUC2	1	CUC2i	72h	35.17	26.33	21.73
2	CUC2	1	CUC2i	72h	NA	26.33	21.63
3	CUC2	1	CUC2i	72h	34.25	26.28	21.5
1	CUC2	1	CUC2i	96h	35.16	27.56	22.54
2	CUC2	1	CUC2i	96h	NA	27.59	22.32
3	CUC2	1	CUC2i	96h	NA	27.23	22.11
1	CUC3	1	CUC2i	NI	31.17	27.33	22.59
2	CUC3	1	CUC2i	NI	31.74	27.44	23.34
3	CUC3	1	CUC2i	NI	31.15	27.02	22.79
1	CUC3	1	CUC2i	24h	29.22	27.94	23.13
2	CUC3	1	CUC2i	24h	29.3	27.25	23.07
3	CUC3	1	CUC2i	24h	29.09	28.36	23.14
1	CUC3	1	cuc2-1	NI	31.8	27.86	22.96
2	CUC3	1	cuc2-1	NI	31.36	27.67	22.89
3	CUC3	1	cuc2-1	NI	30.83	27.46	22.84
1	CUC3	1	CUC2i	48h	30.46	28.2	23.2
2	CUC3	1	CUC2i	48h	30.74	28	23.04
3	CUC3	1	CUC2i	48h	31	28.28	23.03
1	CUC3	1	WT	NI	31.69	28.84	24.29
2	CUC3	1	WT	NI	31.9	28.82	24.16
3	CUC3	1	WT	NI	31.68	28.94	24.17
1	CUC3	1	CUC2i	72h	29	26.33	21.73
2	CUC3	1	CUC2i	72h	29.15	26.33	21.63
3	CUC3	1	CUC2i	72h	28.85	26.28	21.5
1	CUC3	1	CUC2i	96h	30.78	27.56	22.54
2	CUC3	1	CUC2i	96h	31.18	27.59	22.32
3	CUC3	1	CUC2i	96h	30.87	27.23	22.11
1	KLU	1	CUC2i	NI	36.66	27.33	22.59
2	KLU	1	CUC2i	NI	36.44	27.44	23.34
3	KLU	1	CUC2i	NI	37.89	27.02	22.79
1	KLU	1	CUC2i	24h	35.26	27.94	23.13
2	KLU	1	CUC2i	24h	33.96	27.25	23.07
3	KLU	1	CUC2i	24h	34.38	28.36	23.14
1	KLU	1	cuc2-1	NI	35.11	27.86	22.96
2	KLU	1	cuc2-1	NI	34.88	27.67	22.89
3	KLU	1	cuc2-1	NI	34.39	27.46	22.84
1	KLU	1	CUC2i	48h	34.93	28.2	23.2
2	KLU	1	CUC2i	48h	34.25	28	23.04
3	KLU	1	CUC2i	48h	34.39	28.28	23.03
1	KLU	1	WT	NI	34.76	28.84	24.29
2	KLU	1	WT	NI	35.14	28.82	24.16
3	KLU	1	WT	NI	35.46	28.94	24.17
1	KLU	1	CUC2i	72h	34.73	26.33	21.73
2	KLU	1	CUC2i	72h	34.42	26.33	21.63
3	KLU	1	CUC2i	72h	34.07	26.28	21.5
1	KLU	1	CUC2i	96h	36.8	27.56	22.54
2	KLU	1	CUC2i	96h	36.24	27.59	22.32
3	KLU	1	CUC2i	96h	36.09	27.23	22.11
1	CUC2	2	CUC2i	NI	NA	27.54	22.6
2	CUC2	2	CUC2i	NI	NA	27.19	22.69
3	CUC2	2	CUC2i	NI	NA	26.98	22.58
1	CUC2	2	CUC2i	24h	26.16	27.97	23.37
2	CUC2	2	CUC2i	24h	26.38	27.87	23.32
3	CUC2	2	CUC2i	24h	26.36	27.55	23.11
1	CUC2	2	cuc2-1	NI	35.35	27.78	22.79
2	CUC2	2	cuc2-1	NI	NA	27.91	22.83
3	CUC2	2	cuc2-1	NI	NA	28.53	22.84
1	CUC2	2	CUC2i	48h	28.2	28.3	24.33
2	CUC2	2	CUC2i	48h	28.15	28.16	24.18
3	CUC2	2	CUC2i	48h	27.56	27.63	24.25
1	CUC2	2	WT	NI	34.12	28.44	24.09
2	CUC2	2	WT	NI	NA	28.51	24.65
3	CUC2	2	WT	NI	NA	28.42	24.51
1	CUC2	2	CUC2i	72h	35.29	27.39	22.03
2	CUC2	2	CUC2i	72h	35.28	27.13	21.97
3	CUC2	2	CUC2i	72h	33.88	27.55	21.94
1	CUC2	2	CUC2i	96h	35.79	26.93	21.95
2	CUC2	2	CUC2i	96h	34.55	27	21.9
3	CUC2	2	CUC2i	96h	NA	26.84	21.9
1	CUC3	2	CUC2i	NI	31.9	27.54	22.6
2	CUC3	2	CUC2i	NI	31.13	27.19	22.69
3	CUC3	2	CUC2i	NI	30.79	26.98	22.58
1	CUC3	2	CUC2i	24h	28.57	27.97	23.37
2	CUC3	2	CUC2i	24h	28.71	27.87	23.32
3	CUC3	2	CUC2i	24h	28.58	27.55	23.11
1	CUC3	2	cuc2-1	NI	31.25	27.78	22.79
2	CUC3	2	cuc2-1	NI	31	27.91	22.83
3	CUC3	2	cuc2-1	NI	30.85	28.53	22.84
1	CUC3	2	CUC2i	48h	29.12	28.3	24.33
2	CUC3	2	CUC2i	48h	28.74	28.16	24.18
3	CUC3	2	CUC2i	48h	28.61	27.63	24.25
1	CUC3	2	WT	NI	30.22	28.44	24.09
2	CUC3	2	WT	NI	30.41	28.51	24.65
3	CUC3	2	WT	NI	30	28.42	24.51
1	CUC3	2	CUC2i	72h	30.45	27.39	22.03
2	CUC3	2	CUC2i	72h	30.43	27.13	21.97
3	CUC3	2	CUC2i	72h	30.66	27.55	21.94
1	CUC3	2	CUC2i	96h	30.67	26.93	21.95
2	CUC3	2	CUC2i	96h	30.5	27	21.9
3	CUC3	2	CUC2i	96h	30.58	26.84	21.9
1	KLU	2	CUC2i	NI	33.8	27.54	22.6
2	KLU	2	CUC2i	NI	33.65	27.19	22.69
3	KLU	2	CUC2i	NI	33.82	26.98	22.58
1	KLU	2	CUC2i	24h	33.11	27.97	23.37
2	KLU	2	CUC2i	24h	32.84	27.87	23.32
3	KLU	2	CUC2i	24h	32.38	27.55	23.11
1	KLU	2	cuc2-1	NI	36.95	27.78	22.79
2	KLU	2	cuc2-1	NI	35.43	27.91	22.83
3	KLU	2	cuc2-1	NI	37.48	28.53	22.84
1	KLU	2	CUC2i	48h	30.82	28.3	24.33
2	KLU	2	CUC2i	48h	35.14	28.16	24.18
3	KLU	2	CUC2i	48h	34.5	27.63	24.25
1	KLU	2	WT	NI	32.08	28.44	24.09
2	KLU	2	WT	NI	32.42	28.51	24.65
3	KLU	2	WT	NI	32.79	28.42	24.51
1	KLU	2	CUC2i	72h	33.81	27.39	22.03
2	KLU	2	CUC2i	72h	34.63	27.13	21.97
3	KLU	2	CUC2i	72h	32.62	27.55	21.94
1	KLU	2	CUC2i	96h	34.81	26.93	21.95
2	KLU	2	CUC2i	96h	35.92	27	21.9
3	KLU	2	CUC2i	96h	35.23	26.84	21.9
1	CUC2	3	CUC2i	24h	29.62	29.37	24.97
2	CUC2	3	CUC2i	24h	29.67	29.16	24.95
3	CUC2	3	CUC2i	24h	29.15	29.02	24.97
1	CUC2	3	cuc2-1	NI	35.45	27.94	23.29
2	CUC2	3	cuc2-1	NI	NA	27.92	23.1
3	CUC2	3	cuc2-1	NI	NA	27.59	22.98
1	CUC2	3	CUC2i	48h	30.86	28.75	25.15
2	CUC2	3	CUC2i	48h	31	28.76	24.96
3	CUC2	3	CUC2i	48h	31.18	28.71	24.81
1	CUC2	3	WT	NI	NA	30.82	26.71
2	CUC2	3	WT	NI	NA	31.38	26.53
3	CUC2	3	WT	NI	NA	30.66	26.32
1	CUC2	3	CUC2i	72h	34.38	27.09	22.23
2	CUC2	3	CUC2i	72h	33.72	27.05	22.85
3	CUC2	3	CUC2i	72h	35.21	26.93	22.04
1	CUC2	3	CUC2i	96h	35.36	27.87	22.58
2	CUC2	3	CUC2i	96h	35.26	27.64	22.6
3	CUC2	3	CUC2i	96h	35.13	27.6	22.53
1	CUC3	3	CUC2i	24h	32.2	29.37	24.97
2	CUC3	3	CUC2i	24h	31.72	29.16	24.95
3	CUC3	3	CUC2i	24h	31.18	29.02	24.97
1	CUC3	3	cuc2-1	NI	33.43	27.94	23.29
2	CUC3	3	cuc2-1	NI	32.64	27.92	23.1
3	CUC3	3	cuc2-1	NI	32.53	27.59	22.98
1	CUC3	3	CUC2i	48h	30.85	28.75	25.15
2	CUC3	3	CUC2i	48h	31.28	28.76	24.96
3	CUC3	3	CUC2i	48h	30.4	28.71	24.81
1	CUC3	3	WT	NI	32.82	30.82	26.71
2	CUC3	3	WT	NI	35.73	31.38	26.53
3	CUC3	3	WT	NI	NA	30.66	26.32
1	CUC3	3	CUC2i	72h	29.61	27.09	22.23
2	CUC3	3	CUC2i	72h	30	27.05	22.85
3	CUC3	3	CUC2i	72h	29.62	26.93	22.04
1	CUC3	3	CUC2i	96h	31.69	27.87	22.58
2	CUC3	3	CUC2i	96h	31.14	27.64	22.6
3	CUC3	3	CUC2i	96h	31.17	27.6	22.53
1	KLU	3	CUC2i	24h	36.3	29.37	24.97
2	KLU	3	CUC2i	24h	37.29	29.16	24.95
3	KLU	3	CUC2i	24h	36.8	29.02	24.97
1	KLU	3	cuc2-1	NI	38.83	27.94	23.29
2	KLU	3	cuc2-1	NI	NA	27.92	23.1
3	KLU	3	cuc2-1	NI	36.92	27.59	22.98
1	KLU	3	CUC2i	48h	34.65	28.75	25.15
2	KLU	3	CUC2i	48h	34.8	28.76	24.96
3	KLU	3	CUC2i	48h	34.42	28.71	24.81
1	KLU	3	WT	NI	35.28	30.82	26.71
2	KLU	3	WT	NI	34.16	31.38	26.53
3	KLU	3	WT	NI	34.85	30.66	26.32
1	KLU	3	CUC2i	72h	34.25	27.09	22.23
2	KLU	3	CUC2i	72h	33.06	27.05	22.85
3	KLU	3	CUC2i	72h	33.43	26.93	22.04
1	KLU	3	CUC2i	96h	35.92	27.87	22.58
2	KLU	3	CUC2i	96h	36.42	27.64	22.6
3	KLU	3	CUC2i	96h	36.37	27.6	22.53

## Sheet: FigS2FG
Genotype	InductionTime	NbDissectedLeaves	MeanToothNb3MostDissectedLeaf
RFP-CUC2	48h	6	4.33333
RFP-CUC2	48h	6	4
RFP-CUC2	48h	6	3.66667
RFP-CUC2	48h	7	4
RFP-CUC2	48h	6	4
RFP-CUC2	48h	7	3.66667
RFP-CUC2	48h	7	4
RFP-CUC2	48h	7	4
RFP-CUC2	48h	8	4.33333
RFP-CUC2	48h	7	4.33333
RFP-CUC2	24h	8	3.66667
RFP-CUC2	24h	7	3.66667
RFP-CUC2	24h	8	4
RFP-CUC2	24h	8	4
RFP-CUC2	24h	8	3.66667
RFP-CUC2	24h	9	4.33333
RFP-CUC2	24h	8	4
RFP-CUC2	24h	9	3.66667
RFP-CUC2	24h	7	3.33333
RFP-CUC2	24h	7	3.33333
RFP-CUC2	8h	4	2.33333
RFP-CUC2	8h	6	2
RFP-CUC2	8h	5	2.33333
RFP-CUC2	8h	5	3
RFP-CUC2	8h	7	2.33333
RFP-CUC2	8h	9	3.66667
RFP-CUC2	8h	6	3.66667
RFP-CUC2	8h	7	3.33333
RFP-CUC2	8h	7	3
RFP-CUC2	8h	7	2.66667
RFP-CUC2	2h	6	2.33333
RFP-CUC2	2h	1	0.333333
RFP-CUC2	2h	2	0.666667
RFP-CUC2	2h	4	2.33333
RFP-CUC2	2h	5	2.33333
RFP-CUC2	2h	1	0.333333
RFP-CUC2	2h	4	2
RFP-CUC2	2h	2	1
RFP-CUC2	2h	5	2.66667
RFP-CUC2	2h	4	1.66667
CUC2-RFP	48h	7	3.33333
CUC2-RFP	48h	7	4
CUC2-RFP	48h	7	3.66667
CUC2-RFP	48h	5	3.66667
CUC2-RFP	48h	7	4
CUC2-RFP	48h	6	4
CUC2-RFP	48h	8	4
CUC2-RFP	48h	6	4
CUC2-RFP	48h	7	4
CUC2-RFP	48h	8	4.33333
CUC2-RFP	24h	7	3.33333
CUC2-RFP	24h	9	3.66667
CUC2-RFP	24h	8	3.33333
CUC2-RFP	24h	7	4
CUC2-RFP	24h	8	3.66667
CUC2-RFP	24h	6	3.66667
CUC2-RFP	24h	8	4
CUC2-RFP	24h	7	3.66667
CUC2-RFP	24h	7	4
CUC2-RFP	24h	8	3.33333
CUC2-RFP	8h	6	3.66667
CUC2-RFP	8h	7	3.33333
CUC2-RFP	8h	6	3.66667
CUC2-RFP	8h	5	2.66667
CUC2-RFP	8h	5	3
CUC2-RFP	8h	7	2.66667
CUC2-RFP	8h	6	3.33333
CUC2-RFP	8h	7	2.66667
CUC2-RFP	8h	6	3
CUC2-RFP	8h	7	3
CUC2-RFP	2h	4	1.66667
CUC2-RFP	2h	5	1.66667
CUC2-RFP	2h	7	2.66667
CUC2-RFP	2h	4	1.66667
CUC2-RFP	2h	2	1.33333
CUC2-RFP	2h	4	3
CUC2-RFP	2h	5	2
CUC2-RFP	2h	5	3
CUC2-RFP	2h	4	2.33333
CUC2-RFP	2h	3	1.66667

## Sheet: FigS3AB
Genotype	BladeLength	Mean_CUC2-VENUS_Quantity	SD_CUC2-VENUS_Quantity	Height
cuc2-1 C2C2-V(44) he	91	11.7118	4.70249	NA
cuc2-1 C2C2-V(44) he	91	8.88492	3.09401	NA
cuc2-1 C2C2-V(44) he	97	12.372	3.34171	NA
cuc2-1 C2C2-V(44) he	117	11.1098	2.08138	NA
cuc2-1 C2C2-V(44) he	156	3.84367	1.74722	NA
cuc2-1 C2C2-V(44) he	156	5.9425	2.06511	NA
cuc2-1 C2C2-V(44) he	176	8.04633	3.44351	5.93
cuc2-1 C2C2-V(44) he	176	5.48458	4.22761	5.934
cuc2-1 C2C2-V(44) he	199	6.48458	0.872993	8.206
cuc2-1 C2C2-V(44) he	199	8.23442	1.60001	8.504
cuc2-1 C2C2-V(44) he	234	6.01808	1.15847	20.554
cuc2-1 C2C2-V(44) he	234	6.77142	1.43195	5.54
cuc2-1 C2C2-V(44) he	270	3.16917	0.463777	29.416
cuc2-1 C2C2-V(44) he	270	4.38575	1.27905	29.587
cuc2-1 C2C2-V(44) he	335	5.31608	1.63347	22.631
cuc2-1 C2C2-V(44) he	335	7.72692	2.80595	33.456
cuc2-1 C2C2-V(44) he	364	6.72083	1.76707	35.79
cuc2-1 C2C2-V(44) he	364	4.67192	1.713	40.408
cuc2-1 C2C2-V(44) he	435	5.17008	1.75371	41.21
cuc2-1 C2C2-V(44) he	435	5.50708	1.46246	56.737
cuc2-1 C2C2-V(44) he	511	3.29133	1.21963	40.659
cuc2-1 C2C2-V(44) he	511	3.29133	1.21963	51.378
cuc2-1 C2C2-V(44) he	512	3.5025	0.977555	51.893
cuc2-1 C2C2-V(44) he	512	4.177	0.965229	62.803
cuc2-1 C2C2-V(44) he	521	7.73892	2.76374	67.234
cuc2-1 C2C2-V(44) he	521	6.32825	1.90468	43.873
cuc2-1 C2C2-V(44) he	639	3.08242	1.37112	87.597
cuc2-1 C2C2-V(44) he	639	2.81375	0.280665	87.764
cuc2-1 C2C2-V(44) he	659	8.1255	3.14793	90.043
cuc2-1 C2C2-V(44) he	740	5.71567	1.61448	95.01
cuc2-1 C2C2-V(44) he	740	3.05758	1.17551	70.5
cuc2-1 C2C2-V(44) he	796	3.78625	1.86968	96.331
cuc2-1 C2C2-V(44) he	796	1.89533	0.33265	102.047
cuc2-1 C2C2-V(44) ho	80	7.1425	4.29883	NA
cuc2-1 C2C2-V(44) ho	80	10.0988	3.53778	NA
cuc2-1 C2C2-V(44) ho	97	8.33842	2.40704	NA
cuc2-1 C2C2-V(44) ho	119	12.7927	4.58025	NA
cuc2-1 C2C2-V(44) ho	119	13.4518	1.82891	NA
cuc2-1 C2C2-V(44) ho	164	9.74225	4.44181	5.733
cuc2-1 C2C2-V(44) ho	164	9.957	2.52265	4.289
cuc2-1 C2C2-V(44) ho	167	12.5301	5.21047	5.63
cuc2-1 C2C2-V(44) ho	167	10.903	5.56624	6.324
cuc2-1 C2C2-V(44) ho	195	6.865	3.0903	5.418
cuc2-1 C2C2-V(44) ho	195	3.15133	1.70371	12.323
cuc2-1 C2C2-V(44) ho	224	9.85567	3.07954	13.402
cuc2-1 C2C2-V(44) ho	224	7.68292	5.00745	12.549
cuc2-1 C2C2-V(44) ho	277	5.61333	1.87401	26.738
cuc2-1 C2C2-V(44) ho	277	6.0215	1.61602	16.5
cuc2-1 C2C2-V(44) ho	288	6.89092	2.19909	31.652
cuc2-1 C2C2-V(44) ho	288	6.84017	2.4587	24.572
cuc2-1 C2C2-V(44) ho	297	7.44767	2.87492	37.188
cuc2-1 C2C2-V(44) ho	297	7.97942	3.9622	30.92
cuc2-1 C2C2-V(44) ho	375	9.04975	2.99013	36.708
cuc2-1 C2C2-V(44) ho	375	8.91233	2.77291	41.482
cuc2-1 C2C2-V(44) ho	404	10.5301	2.70926	31.564
cuc2-1 C2C2-V(44) ho	404	10.1134	1.95771	45.956
cuc2-1 C2C2-V(44) ho	416	9.58008	3.55327	43.84
cuc2-1 C2C2-V(44) ho	416	6.67883	3.71322	42.443
cuc2-1 C2C2-V(44) ho	449	8.25083	2.20713	57.209
cuc2-1 C2C2-V(44) ho	449	7.48708	1.10461	50.003
cuc2-1 C2C2-V(44) ho	466	4.55158	1.33952	44.662
cuc2-1 C2C2-V(44) ho	466	5.94575	1.44118	58.577
cuc2-1 C2C2-V(44) ho	586	7.45717	1.44235	76.844
cuc2-1 C2C2-V(44) ho	586	7.70792	1.01542	90.53
cuc2-1 C2C2-V(44) ho	589	8.59625	0.863573	103.163
cuc2-1 C2C2-V(44) ho	589	8.88658	2.69828	66.137
cuc2-1 C2C2-V(44) ho	639	9.1675	1.24766	79.371
cuc2-1 C2C2-V(44) ho	639	6.0205	1.06821	114.092
cuc2-1 C2C2-V(44) ho	641	6.67342	0.912396	61.896
cuc2-1 C2C2-V(44) ho	641	5.43975	1.30367	89.046
cuc2-1 C2C2-V(44) ho	741	5.01792	1.57651	78.839
cuc2-1 C2C2-V(44) ho	741	6.46558	1.75005	115.846
cuc2-1 C2C2-V(44) ho	789	5.26558	1.18747	93.605
cuc2-1 C2C2-V(44) ho	789	6.03333	1.16839	102.764
cuc2-1 C2C2-V(45) he	45	5.47675	2.45734	NA
cuc2-1 C2C2-V(45) he	45	18.4287	6.58193	NA
cuc2-1 C2C2-V(45) he	102	12.7131	4.87319	NA
cuc2-1 C2C2-V(45) he	102	2.73025	0.914658	NA
cuc2-1 C2C2-V(45) he	118	7.19425	2.23182	NA
cuc2-1 C2C2-V(45) he	118	2.20867	0.940106	NA
cuc2-1 C2C2-V(45) he	138	9.08342	2.11337	NA
cuc2-1 C2C2-V(45) he	146	8.79117	2.66945	NA
cuc2-1 C2C2-V(45) he	146	9.33158	1.59256	NA
cuc2-1 C2C2-V(45) he	183	5.92267	2.08406	8.162
cuc2-1 C2C2-V(45) he	183	6.20442	0.903954	7.252
cuc2-1 C2C2-V(45) he	195	4.04467	0.672989	11.24
cuc2-1 C2C2-V(45) he	195	4.79892	1.33438	10.705
cuc2-1 C2C2-V(45) he	195	5.15225	1.60278	10.518
cuc2-1 C2C2-V(45) he	195	4.98533	1.77455	9.933
cuc2-1 C2C2-V(45) he	283	6.47167	1.23398	18.921
cuc2-1 C2C2-V(45) he	283	9.97425	3.10225	19.114
cuc2-1 C2C2-V(45) he	287	6.62792	3.061	27.16
cuc2-1 C2C2-V(45) he	287	6.09708	2.31705	25.148
cuc2-1 C2C2-V(45) he	325	7.98283	1.48526	36.093
cuc2-1 C2C2-V(45) he	325	8.29033	3.1955	29.809
cuc2-1 C2C2-V(45) he	347	7.58583	0.803383	39.775
cuc2-1 C2C2-V(45) he	347	7.19425	2.86046	46.506
cuc2-1 C2C2-V(45) he	427	5.5825	2.0253	56.032
cuc2-1 C2C2-V(45) he	427	5.09883	1.30929	45.84
cuc2-1 C2C2-V(45) he	444	6.57642	1.61099	57.59
cuc2-1 C2C2-V(45) he	444	6.1615	2.76145	48.059
cuc2-1 C2C2-V(45) he	485	3.13575	0.47512	85.05
cuc2-1 C2C2-V(45) he	485	3.30933	0.86213	52.48
cuc2-1 C2C2-V(45) he	562	4.31967	1.06116	62.192
cuc2-1 C2C2-V(45) he	570	5.68708	1.22191	81.622
cuc2-1 C2C2-V(45) he	570	5.73975	1.30685	56.015
cuc2-1 C2C2-V(45) he	624	6.48442	1.31318	78.72
cuc2-1 C2C2-V(45) he	624	6.30667	1.69924	68.252
cuc2-1 C2C2-V(45) he	647	3.57125	0.953498	81.311
cuc2-1 C2C2-V(45) he	647	3.76808	1.3564	91.421
cuc2-1 C2C2-V(45) he	756	3.71233	2.02199	107.082
cuc2-1 C2C2-V(45) he	756	2.44342	0.331037	69.243
cuc2-1 C2C2-V(45) he	777	4.7535	0.840983	94.775
cuc2-1 C2C2-V(45) he	777	4.28875	0.888604	88.897
cuc2-1 C2C2-V(45) ho	94	12.2998	3.15708	NA
cuc2-1 C2C2-V(45) ho	113	12.7491	3.63632	NA
cuc2-1 C2C2-V(45) ho	113	7.56775	1.94927	NA
cuc2-1 C2C2-V(45) ho	138	11.5396	3.69152	NA
cuc2-1 C2C2-V(45) ho	138	9.80575	3.95524	NA
cuc2-1 C2C2-V(45) ho	157	15.5694	5.4295	4.107
cuc2-1 C2C2-V(45) ho	157	14.2208	4.27158	9.953
cuc2-1 C2C2-V(45) ho	176	9.59358	2.04605	5.89
cuc2-1 C2C2-V(45) ho	176	11.1262	6.95938	5.425
cuc2-1 C2C2-V(45) ho	195	14.4502	1.75926	8.971
cuc2-1 C2C2-V(45) ho	195	12.6581	4.54763	8.369
cuc2-1 C2C2-V(45) ho	212	9.88833	3.26964	9.027
cuc2-1 C2C2-V(45) ho	212	9.67783	3.07906	3.961
cuc2-1 C2C2-V(45) ho	224	9.7045	4.86651	13.542
cuc2-1 C2C2-V(45) ho	224	11.2946	4.88587	20.208
cuc2-1 C2C2-V(45) ho	261	6.20108	1.4792	15.922
cuc2-1 C2C2-V(45) ho	261	8.67283	4.0012	23.131
cuc2-1 C2C2-V(45) ho	285	12.5558	6.0348	30.991
cuc2-1 C2C2-V(45) ho	285	13.5627	6.33943	29.285
cuc2-1 C2C2-V(45) ho	315	12.6735	3.01027	35.672
cuc2-1 C2C2-V(45) ho	315	9.00517	3.46693	21.939
cuc2-1 C2C2-V(45) ho	330	12.3317	4.3764	15.916
cuc2-1 C2C2-V(45) ho	366	10.2199	3.04482	38.444
cuc2-1 C2C2-V(45) ho	366	8.05592	2.37891	26.641
cuc2-1 C2C2-V(45) ho	402	9.72767	3.41009	49.289
cuc2-1 C2C2-V(45) ho	402	10.0635	2.08366	38.718
cuc2-1 C2C2-V(45) ho	405	9.2715	2.32452	46.428
cuc2-1 C2C2-V(45) ho	405	12.9151	2.22909	38.254
cuc2-1 C2C2-V(45) ho	468	9.81017	2.45984	52.05
cuc2-1 C2C2-V(45) ho	468	6.81367	0.914023	71.8
cuc2-1 C2C2-V(45) ho	486	10.0052	3.76327	44.06
cuc2-1 C2C2-V(45) ho	486	6.74842	1.35361	57.17
cuc2-1 C2C2-V(45) ho	520	9.28692	3.32442	62.728
cuc2-1 C2C2-V(45) ho	520	9.13492	1.59883	82.579
cuc2-1 C2C2-V(45) ho	534	7.61692	1.7499	53.641
cuc2-1 C2C2-V(45) ho	534	9.21408	2.60505	86.733
cuc2-1 C2C2-V(45) ho	673	9.80325	1.95393	94.148
cuc2-1 C2C2-V(45) ho	681	11.1047	1.3606	85.563
cuc2-1 C2C2-V(45) ho	681	15.4347	1.71522	93.324
cuc2-1 C2C2-V(45) ho	752	5.98517	1.03746	125.421
cuc2-1 C2C2-V(45) ho	752	7.96225	1.6848	105.937

## Sheet: FigS3CD
Genotype	BladeLength	Mean_CUC2-VENUS_Quantity	SD_CUC2-VENUS_Quantity	Height
ago1-27 cuc2-3 C2C2-V(33) he	69	51.4845	3.20524	NA
ago1-27 cuc2-3 C2C2-V(33) he	69	33.5566	6.13716	NA
ago1-27 cuc2-3 C2C2-V(33) he	75	53.0181	12.2229	NA
ago1-27 cuc2-3 C2C2-V(33) he	75	9.79913	1.67225	NA
ago1-27 cuc2-3 C2C2-V(33) he	113	20.9665	3.19415	NA
ago1-27 cuc2-3 C2C2-V(33) he	113	35.5115	4.8299	NA
ago1-27 cuc2-3 C2C2-V(33) he	124	50.6095	14.1599	NA
ago1-27 cuc2-3 C2C2-V(33) he	124	55.0698	12.7482	NA
ago1-27 cuc2-3 C2C2-V(33) he	133	38.9819	8.67255	NA
ago1-27 cuc2-3 C2C2-V(33) he	133	17.299	4.17257	NA
ago1-27 cuc2-3 C2C2-V(33) he	148	44.0539	10.184	NA
ago1-27 cuc2-3 C2C2-V(33) he	148	39.4215	3.87344	NA
ago1-27 cuc2-3 C2C2-V(33) he	150	55.4909	8.25987	NA
ago1-27 cuc2-3 C2C2-V(33) he	150	29.6021	5.22603	NA
ago1-27 cuc2-3 C2C2-V(33) he	180	68.1146	7.48369	5.516
ago1-27 cuc2-3 C2C2-V(33) he	207	50.553	8.43823	14.638
ago1-27 cuc2-3 C2C2-V(33) he	207	47.902	8.33005	6.089
ago1-27 cuc2-3 C2C2-V(33) he	208	62.0042	5.14742	13.371
ago1-27 cuc2-3 C2C2-V(33) he	208	73.6489	13.7028	16.42
ago1-27 cuc2-3 C2C2-V(33) he	209	64.5363	14.8811	10.611
ago1-27 cuc2-3 C2C2-V(33) he	209	75.7643	6.99154	18.186
ago1-27 cuc2-3 C2C2-V(33) he	210	62.5583	12.2897	11.926
ago1-27 cuc2-3 C2C2-V(33) he	210	69.9172	9.22817	14.659
ago1-27 cuc2-3 C2C2-V(33) he	239	64.92	12.3388	19.698
ago1-27 cuc2-3 C2C2-V(33) he	239	55.3567	9.21951	27.848
ago1-27 cuc2-3 C2C2-V(33) he	280	56.474	6.56459	39.609
ago1-27 cuc2-3 C2C2-V(33) he	280	30.3865	6.13628	25.803
ago1-27 cuc2-3 C2C2-V(33) he	292	61.7126	10.4441	25.455
ago1-27 cuc2-3 C2C2-V(33) he	292	61.5219	4.83978	15.878
ago1-27 cuc2-3 C2C2-V(33) he	302	83.4381	9.71131	34.176
ago1-27 cuc2-3 C2C2-V(33) he	302	91.6779	8.35264	47.122
ago1-27 cuc2-3 C2C2-V(33) he	380	29.9518	8.02982	47.809
ago1-27 cuc2-3 C2C2-V(33) he	384	21.8325	1.7568	51.214
ago1-27 cuc2-3 C2C2-V(33) he	384	26.4389	4.41521	57.835
ago1-27 cuc2-3 C2C2-V(33) he	412	28.0154	6.16465	71.722
ago1-27 cuc2-3 C2C2-V(33) he	412	30.3737	4.77368	69.978
ago1-27 cuc2-3 C2C2-V(33) he	424	49.1944	4.70041	78.868
ago1-27 cuc2-3 C2C2-V(33) he	424	44.5824	5.58251	72.349
ago1-27 cuc2-3 C2C2-V(33) he	431	26.3453	4.28967	64.436
ago1-27 cuc2-3 C2C2-V(33) he	431	26.8762	4.84343	83.861
ago1-27 cuc2-3 C2C2-V(33) he	447	42.4161	6.78612	83.969
ago1-27 cuc2-3 C2C2-V(33) he	447	42.2293	4.92882	73.925
ago1-27 cuc2-3 C2C2-V(33) he	536	25.8874	7.20031	111.207
ago1-27 cuc2-3 C2C2-V(33) he	536	23.9288	2.09999	113.62
ago1-27 cuc2-3 C2C2-V(33) he	586	29.3015	6.65589	135.899
ago1-27 cuc2-3 C2C2-V(33) he	586	32.2741	4.68863	122.361
ago1-27 cuc2-3 C2C2-V(33) he	639	29.4537	3.62006	127.725
ago1-27 cuc2-3 C2C2-V(33) he	639	26.452	4.67812	124.694
ago1-27 cuc2-3 C2C2-V(33) he	724	19.1771	4.0492	170.738
ago1-27 cuc2-3 C2C2-V(33) he	724	29.6202	6.51047	163.681
ago1-27 cuc2-3 C2C2-V(33) he	754	22.8127	2.74763	167.322
ago1-27 cuc2-3 C2C2-V(33) he	754	25.591	4.44361	174.05
ago1-27 cuc2-3 C2C2-V(33) ho	98.724	41.4054	7.22505	NA
ago1-27 cuc2-3 C2C2-V(33) ho	98.724	19.9383	3.45159	NA
ago1-27 cuc2-3 C2C2-V(33) ho	100.456	35.5221	4.94105	NA
ago1-27 cuc2-3 C2C2-V(33) ho	120.926	48.326	7.10438	NA
ago1-27 cuc2-3 C2C2-V(33) ho	120.926	39.0065	8.21419	6.266
ago1-27 cuc2-3 C2C2-V(33) ho	153.489	49.4701	4.43224	8.121
ago1-27 cuc2-3 C2C2-V(33) ho	153.489	37.2834	3.65093	8.537
ago1-27 cuc2-3 C2C2-V(33) ho	172.005	37.1018	1.79492	7.111
ago1-27 cuc2-3 C2C2-V(33) ho	172.005	42.1715	5.19973	6.581
ago1-27 cuc2-3 C2C2-V(33) ho	187.324	43.549	6.20774	11.384
ago1-27 cuc2-3 C2C2-V(33) ho	187.324	40.9921	4.79149	11.914
ago1-27 cuc2-3 C2C2-V(33) ho	204.145	48.759	3.09453	13.93
ago1-27 cuc2-3 C2C2-V(33) ho	204.145	30.2924	5.5701	18.231
ago1-27 cuc2-3 C2C2-V(33) ho	225.567	47.9356	8.32485	18.861
ago1-27 cuc2-3 C2C2-V(33) ho	225.567	43.1535	6.5799	17.153
ago1-27 cuc2-3 C2C2-V(33) ho	284.338	36.2255	4.70818	18.948
ago1-27 cuc2-3 C2C2-V(33) ho	284.338	40.6946	4.03091	20.871
ago1-27 cuc2-3 C2C2-V(33) ho	293.426	42.1328	4.99434	37.101
ago1-27 cuc2-3 C2C2-V(33) ho	293.426	47.2656	7.14488	33.288
ago1-27 cuc2-3 C2C2-V(33) ho	338.213	43.9895	5.02029	57.129
ago1-27 cuc2-3 C2C2-V(33) ho	338.213	39.6005	2.57723	70.207
ago1-27 cuc2-3 C2C2-V(33) ho	359.645	28.2075	2.89746	38.54
ago1-27 cuc2-3 C2C2-V(33) ho	359.645	37.063	5.69499	39.826
ago1-27 cuc2-3 C2C2-V(33) ho	372.181	44.6444	5.96721	74.042
ago1-27 cuc2-3 C2C2-V(33) ho	372.181	62.8041	7.7606	74.996
ago1-27 cuc2-3 C2C2-V(33) ho	407.181	52.1701	2.97589	66.81
ago1-27 cuc2-3 C2C2-V(33) ho	407.181	51.7269	4.79668	83.918
ago1-27 cuc2-3 C2C2-V(33) ho	422.62	47.2797	5.16855	76.308
ago1-27 cuc2-3 C2C2-V(33) ho	422.62	49.7989	7.13789	77.601
ago1-27 cuc2-3 C2C2-V(33) ho	458.464	47.7293	4.59115	62.775
ago1-27 cuc2-3 C2C2-V(33) ho	458.464	52.0849	3.60232	81.435
ago1-27 cuc2-3 C2C2-V(33) ho	474.28	53.0131	3.87641	110.266
ago1-27 cuc2-3 C2C2-V(33) ho	514.38	63.7717	8.50751	103.368
ago1-27 cuc2-3 C2C2-V(33) ho	514.38	52.4174	4.8459	113.674
ago1-27 cuc2-3 C2C2-V(33) ho	536.527	42.9435	3.38569	108.228
ago1-27 cuc2-3 C2C2-V(33) ho	536.527	52.9113	3.17027	109.886
ago1-27 cuc2-3 C2C2-V(33) ho	559.662	52.0824	3.98098	84.094
ago1-27 cuc2-3 C2C2-V(33) ho	559.662	52.3582	3.84084	103.962
ago1-27 cuc2-3 C2C2-V(33) ho	580.55	63.5528	5.66243	148.267
ago1-27 cuc2-3 C2C2-V(33) ho	580.55	56.6636	8.48296	122.869
ago1-27 cuc2-3 C2C2-V(33) ho	590.817	25.9445	1.86476	119.795
ago1-27 cuc2-3 C2C2-V(33) ho	590.817	18.3106	1.80926	154.143
ago1-27 cuc2-3 C2C2-V(33) ho	629.44	34.0475	8.67938	134.061
ago1-27 cuc2-3 C2C2-V(33) ho	679.664	64.1456	5.16494	170.341
ago1-27 cuc2-3 C2C2-V(33) ho	679.664	40.402	6.479	151.933
cuc2-3 C2C2-V(33) he	110	11.7561	8.04636	NA
cuc2-3 C2C2-V(33) he	110	10.5687	3.30239	NA
cuc2-3 C2C2-V(33) he	117	15.6478	2.96503	NA
cuc2-3 C2C2-V(33) he	126	7.64775	2.88425	NA
cuc2-3 C2C2-V(33) he	157	8.40033	3.82949	2.766
cuc2-3 C2C2-V(33) he	157	8.73458	3.23819	2.326
cuc2-3 C2C2-V(33) he	173	7.04975	3.20775	8.215
cuc2-3 C2C2-V(33) he	173	8.31692	3.43477	4.167
cuc2-3 C2C2-V(33) he	182	10.5474	4.42913	5.091
cuc2-3 C2C2-V(33) he	182	11.8179	4.05644	6.822
cuc2-3 C2C2-V(33) he	211	9.36342	4.62141	8.386
cuc2-3 C2C2-V(33) he	211	7.88833	3.45339	5.038
cuc2-3 C2C2-V(33) he	214	8.59792	2.75841	14.551
cuc2-3 C2C2-V(33) he	214	7.24583	1.64649	25.071
cuc2-3 C2C2-V(33) he	218	11.2327	4.09175	6.788
cuc2-3 C2C2-V(33) he	218	11.1925	2.0196	8.48
cuc2-3 C2C2-V(33) he	231	11.4632	3.5951	9.238
cuc2-3 C2C2-V(33) he	231	12.5077	4.64569	13.987
cuc2-3 C2C2-V(33) he	245	7.817	2.41354	10.129
cuc2-3 C2C2-V(33) he	245	9.27825	2.71138	14.106
cuc2-3 C2C2-V(33) he	271	11.5972	4.9553	14.225
cuc2-3 C2C2-V(33) he	271	9.53	5.04612	14.989
cuc2-3 C2C2-V(33) he	288	19.0799	2.54825	18.356
cuc2-3 C2C2-V(33) he	288	9.75775	1.9624	9.104
cuc2-3 C2C2-V(33) he	300	13.0214	6.17189	10.677
cuc2-3 C2C2-V(33) he	300	10.7673	2.61342	31.45
cuc2-3 C2C2-V(33) he	303	10.226	3.52355	19.123
cuc2-3 C2C2-V(33) he	303	12.311	5.12787	27.341
cuc2-3 C2C2-V(33) he	309	8.06017	1.93179	20.1
cuc2-3 C2C2-V(33) he	309	5.4665	1.45935	31.821
cuc2-3 C2C2-V(33) he	314	9.56625	3.71756	26.147
cuc2-3 C2C2-V(33) he	314	8.237	3.36286	25.777
cuc2-3 C2C2-V(33) he	316	10.5852	3.44982	34.977
cuc2-3 C2C2-V(33) he	316	9.36	2.2377	23.383
cuc2-3 C2C2-V(33) he	320	8.37625	3.6732	34.666
cuc2-3 C2C2-V(33) he	320	7.35575	4.03107	42.84
cuc2-3 C2C2-V(33) he	383	5.464	2.22529	35.7
cuc2-3 C2C2-V(33) he	383	5.9175	1.03115	35.824
cuc2-3 C2C2-V(33) he	405	6.51283	2.10012	33.354
cuc2-3 C2C2-V(33) he	405	5.97092	1.02552	43.306
cuc2-3 C2C2-V(33) he	435	8.726	3.54097	54.41
cuc2-3 C2C2-V(33) he	436	11.9579	2.46742	57.015
cuc2-3 C2C2-V(33) he	436	13.506	4.45953	46.223
cuc2-3 C2C2-V(33) he	465	6.81608	2.04552	44.401
cuc2-3 C2C2-V(33) he	465	7.13408	1.13477	58.695
cuc2-3 C2C2-V(33) he	466	5.859	1.46887	65.496
cuc2-3 C2C2-V(33) he	466	5.03183	1.19991	52.188
cuc2-3 C2C2-V(33) he	476	8.6855	3.07455	51.777
cuc2-3 C2C2-V(33) he	476	8.44592	1.80434	45.94
cuc2-3 C2C2-V(33) he	477	5.6795	1.98995	59.799
cuc2-3 C2C2-V(33) he	477	6.17792	1.80894	70.595
cuc2-3 C2C2-V(33) he	503	3.10308	0.832267	60.455
cuc2-3 C2C2-V(33) he	503	4.6005	0.905699	54.325
cuc2-3 C2C2-V(33) he	505	8.19158	5.15191	66.23
cuc2-3 C2C2-V(33) he	505	6.29217	2.21977	82.327
cuc2-3 C2C2-V(33) he	553	5.30317	1.70047	61.716
cuc2-3 C2C2-V(33) he	553	5.59108	2.29591	68.91
cuc2-3 C2C2-V(33) he	594	6.9665	3.41894	81.201
cuc2-3 C2C2-V(33) he	594	4.768	1.08116	101.681
cuc2-3 C2C2-V(33) he	598	3.95092	1.63651	89.319
cuc2-3 C2C2-V(33) he	598	3.67683	0.990258	66.989
cuc2-3 C2C2-V(33) he	602	6.06708	3.88684	56.169
cuc2-3 C2C2-V(33) he	602	4.78875	1.24083	73.205
cuc2-3 C2C2-V(33) he	622	9.15292	3.97727	75.46
cuc2-3 C2C2-V(33) he	656	8.58242	3.81979	62.293
cuc2-3 C2C2-V(33) he	712	5.50775	1.31444	84.725
cuc2-3 C2C2-V(33) he	712	2.22258	1.30716	81.236
cuc2-3 C2C2-V(33) he	717	0.410667	0.181859	97.688
cuc2-3 C2C2-V(33) he	717	0.292167	0.0790291	103.236
cuc2-3 C2C2-V(33) he	727	1.89783	0.941246	98.518
cuc2-3 C2C2-V(33) he	727	9.97608	3.07722	108.98
cuc2-3 C2C2-V(33) he	770	3.03525	1.39116	76.586
cuc2-3 C2C2-V(33) he	770	9.21825	4.32118	71.202
cuc2-3 C2C2-V(33) he	780	4.92192	1.35709	79.784
cuc2-3 C2C2-V(33) he	780	1.15375	0.676792	72.439
cuc2-3 C2C2-V(33) ho	78	16.7327	5.28568	NA
cuc2-3 C2C2-V(33) ho	78	21.4673	4.19621	NA
cuc2-3 C2C2-V(33) ho	96	12.062	2.59421	NA
cuc2-3 C2C2-V(33) ho	96	17.5832	3.03376	NA
cuc2-3 C2C2-V(33) ho	116	11.5378	4.47599	NA
cuc2-3 C2C2-V(33) ho	116	7.63567	4.0546	NA
cuc2-3 C2C2-V(33) ho	146	14.0523	3.49157	3.818
cuc2-3 C2C2-V(33) ho	146	10.7258	4.09136	5.753
cuc2-3 C2C2-V(33) ho	173	5.79467	2.07446	5.247
cuc2-3 C2C2-V(33) ho	173	6.60475	1.69397	7.769
cuc2-3 C2C2-V(33) ho	206	6.31208	1.85087	8.579
cuc2-3 C2C2-V(33) ho	206	6.32975	1.43591	11.356
cuc2-3 C2C2-V(33) ho	210	13.9767	4.05476	8.452
cuc2-3 C2C2-V(33) ho	210	12.4673	2.03865	7.489
cuc2-3 C2C2-V(33) ho	215	5.72692	2.88308	15.894
cuc2-3 C2C2-V(33) ho	215	5.38317	2.37601	14.454
cuc2-3 C2C2-V(33) ho	278	11.6898	3.99092	36.139
cuc2-3 C2C2-V(33) ho	278	14.7069	4.44091	33.871
cuc2-3 C2C2-V(33) ho	295	10.2294	5.99824	18.375
cuc2-3 C2C2-V(33) ho	295	22.9098	4.66538	23.105
cuc2-3 C2C2-V(33) ho	375	11.957	5.55371	43.208
cuc2-3 C2C2-V(33) ho	375	10.0233	1.83541	43.629
cuc2-3 C2C2-V(33) ho	411	9.41325	2.87612	38.097
cuc2-3 C2C2-V(33) ho	411	10.414	3.14745	40.542
cuc2-3 C2C2-V(33) ho	419	13.0937	3.39388	53.79
cuc2-3 C2C2-V(33) ho	419	12.0077	2.92938	55.07
cuc2-3 C2C2-V(33) ho	453	7.84108	2.20756	56.975
cuc2-3 C2C2-V(33) ho	453	10.0703	2.61217	42.74
cuc2-3 C2C2-V(33) ho	481	8.87708	1.10171	81.373
cuc2-3 C2C2-V(33) ho	481	12.0232	2.55113	60.45
cuc2-3 C2C2-V(33) ho	524	10.531	2.54167	92.984
cuc2-3 C2C2-V(33) ho	524	10.549	2.3932	52.667
cuc2-3 C2C2-V(33) ho	537	8.61333	1.37504	70.011
cuc2-3 C2C2-V(33) ho	537	11.3145	1.44282	66.876
cuc2-3 C2C2-V(33) ho	600	11.2079	3.73318	61.293
cuc2-3 C2C2-V(33) ho	600	7.2225	0.951003	86.104
cuc2-3 C2C2-V(33) ho	617	11.4871	2.27605	98.107
cuc2-3 C2C2-V(33) ho	617	6.25167	1.53221	102.115
cuc2-3 C2C2-V(33) ho	693	12.6203	4.41111	96.786
cuc2-3 C2C2-V(33) ho	693	17.0172	4.48931	80.457
cuc2-3 C2C2-V(33) ho	734	12.8575	3.72026	108.611
cuc2-3 C2C2-V(33) ho	749	13.5154	3.35383	75.726
cuc2-3 C2C2-V(33) ho	749	8.71992	1.46164	116.241
jawD cuc2-3 C2C2-V(33) ho	186	16.4408	4.44561	4.442
jawD cuc2-3 C2C2-V(33) ho	186	20.1126	4.10527	4.718
jawD cuc2-3 C2C2-V(33) ho	202	17.1278	7.36463	8.265
jawD cuc2-3 C2C2-V(33) ho	202	19.269	3.12467	7.102
jawD cuc2-3 C2C2-V(33) ho	208	16.0061	5.77763	10.44
jawD cuc2-3 C2C2-V(33) ho	208	14.3926	4.64975	10.386
jawD cuc2-3 C2C2-V(33) ho	211	7.75942	1.29769	10.032
jawD cuc2-3 C2C2-V(33) ho	211	5.445	1.49651	6.82
jawD cuc2-3 C2C2-V(33) ho	255	15.0532	2.32572	25.403
jawD cuc2-3 C2C2-V(33) ho	255	14.1434	5.6167	18.888
jawD cuc2-3 C2C2-V(33) ho	257	13.6384	2.92144	15.842
jawD cuc2-3 C2C2-V(33) ho	257	21.1607	5.8843	15.239
jawD cuc2-3 C2C2-V(33) ho	295	8.64525	2.93521	28.79
jawD cuc2-3 C2C2-V(33) ho	295	10.7637	2.50932	22.483
jawD cuc2-3 C2C2-V(33) ho	312.627	7.64342	2.88738	41.371
jawD cuc2-3 C2C2-V(33) ho	312.627	6.54292	3.08964	39.927
jawD cuc2-3 C2C2-V(33) ho	349	17.8498	5.74969	36.816
jawD cuc2-3 C2C2-V(33) ho	349	21.5859	8.91306	23.876
jawD cuc2-3 C2C2-V(33) ho	373	9.92433	3.14076	35.06
jawD cuc2-3 C2C2-V(33) ho	373	8.65458	1.96817	35.822
jawD cuc2-3 C2C2-V(33) ho	415.805	6.47083	1.93782	60.061
jawD cuc2-3 C2C2-V(33) ho	415.805	10.3265	3.33036	57.631
jawD cuc2-3 C2C2-V(33) ho	424	16.153	2.58137	48.448
jawD cuc2-3 C2C2-V(33) ho	424	14.6057	3.43445	42.995
jawD cuc2-3 C2C2-V(33) ho	465	8.24317	2.28377	47.953
jawD cuc2-3 C2C2-V(33) ho	465	5.56958	1.02668	58.022
jawD cuc2-3 C2C2-V(33) ho	484	8.24733	1.28488	71.835
jawD cuc2-3 C2C2-V(33) ho	484	9.18392	1.75282	62.82
jawD cuc2-3 C2C2-V(33) ho	495	20.3368	5.27185	71.179
jawD cuc2-3 C2C2-V(33) ho	495	20.0448	10.4869	58.995
jawD cuc2-3 C2C2-V(33) ho	604.932	8.98792	3.7427	112.36
jawD cuc2-3 C2C2-V(33) ho	604.932	6.33067	1.64573	93.449
jawD cuc2-3 C2C2-V(33) ho	613	10.3668	2.7731	101.098
jawD cuc2-3 C2C2-V(33) ho	613	8.74075	2.36324	101.717
jawD cuc2-3 C2C2-V(33) ho	655	12.427	3.16787	101.123
jawD cuc2-3 C2C2-V(33) ho	655	8.87875	2.33603	95.711
jawD cuc2-3 C2C2-V(33) ho	686.421	6.92692	1.5818	99.582
jawD cuc2-3 C2C2-V(33) ho	686.421	8.05933	2.66337	118.116
jawD cuc2-3 C2C2-V(33) ho	697	9.75792	2.22644	103.138
mir164a-4 cuc2-3 C2C2-V(33) he	161	18.1074	3.89247	5.798
mir164a-4 cuc2-3 C2C2-V(33) he	161	20.9133	4.25478	4.199
mir164a-4 cuc2-3 C2C2-V(33) he	183	30.8412	7.5866	2.977
mir164a-4 cuc2-3 C2C2-V(33) he	193	31.1761	8.39019	3.941
mir164a-4 cuc2-3 C2C2-V(33) he	193	35.1297	7.26193	4.107
mir164a-4 cuc2-3 C2C2-V(33) he	209	43.7748	14.0496	8.816
mir164a-4 cuc2-3 C2C2-V(33) he	230	36.9812	6.86653	8.88
mir164a-4 cuc2-3 C2C2-V(33) he	230	37.5506	6.89133	9.893
mir164a-4 cuc2-3 C2C2-V(33) he	232	40.4364	8.36223	27.344
mir164a-4 cuc2-3 C2C2-V(33) he	232	26.982	6.55657	19.322
mir164a-4 cuc2-3 C2C2-V(33) he	241	41.243	10.4145	11.442
mir164a-4 cuc2-3 C2C2-V(33) he	241	31.4863	5.38105	12.789
mir164a-4 cuc2-3 C2C2-V(33) he	261	43.9408	8.00568	23.88
mir164a-4 cuc2-3 C2C2-V(33) he	261	49.6545	11.076	12.439
mir164a-4 cuc2-3 C2C2-V(33) he	263	40.2165	10.9169	21.214
mir164a-4 cuc2-3 C2C2-V(33) he	263	37.2053	6.49119	14.486
mir164a-4 cuc2-3 C2C2-V(33) he	263	23.1324	7.91729	16.486
mir164a-4 cuc2-3 C2C2-V(33) he	327	39.2072	7.51356	27.809
mir164a-4 cuc2-3 C2C2-V(33) he	327	39.9038	7.86218	35.409
mir164a-4 cuc2-3 C2C2-V(33) he	342	28.4124	6.7575	44.413
mir164a-4 cuc2-3 C2C2-V(33) he	342	18.5214	4.28334	37.116
mir164a-4 cuc2-3 C2C2-V(33) he	358	34.7441	13.1171	31.247
mir164a-4 cuc2-3 C2C2-V(33) he	358	55.0111	7.14052	36.369
mir164a-4 cuc2-3 C2C2-V(33) he	384	36.1142	11.8085	34.209
mir164a-4 cuc2-3 C2C2-V(33) he	384	40.9477	12.6461	53.338
mir164a-4 cuc2-3 C2C2-V(33) he	410	31.2347	6.61623	48.444
mir164a-4 cuc2-3 C2C2-V(33) he	410	31.2877	7.89593	69.294
mir164a-4 cuc2-3 C2C2-V(33) he	480	30.8368	4.3671	60.646
mir164a-4 cuc2-3 C2C2-V(33) he	480	30.1134	4.29944	69.061
mir164a-4 cuc2-3 C2C2-V(33) he	485	29.9218	5.29611	55.482
mir164a-4 cuc2-3 C2C2-V(33) he	485	25.287	9.20256	69.113
mir164a-4 cuc2-3 C2C2-V(33) he	529	27.4091	7.06245	74.388
mir164a-4 cuc2-3 C2C2-V(33) he	553	9.67525	1.15975	58.243
mir164a-4 cuc2-3 C2C2-V(33) he	553	10.6278	1.86763	85.543
mir164a-4 cuc2-3 C2C2-V(33) he	582	22.4725	7.88311	79.35
mir164a-4 cuc2-3 C2C2-V(33) he	582	29.5918	6.04964	102.601
mir164a-4 cuc2-3 C2C2-V(33) he	634	35.0911	3.17317	103.632
mir164a-4 cuc2-3 C2C2-V(33) he	634	33.3402	7.08079	86.162
mir164a-4 cuc2-3 C2C2-V(33) he	715	11.0499	3.415	125.436
mir164a-4 cuc2-3 C2C2-V(33) ho	112	11.5059	2.83284	NA
mir164a-4 cuc2-3 C2C2-V(33) ho	112	13.5653	6.1846	NA
mir164a-4 cuc2-3 C2C2-V(33) ho	116	23.4252	8.53311	NA
mir164a-4 cuc2-3 C2C2-V(33) ho	116	9.61775	2.95879	NA
mir164a-4 cuc2-3 C2C2-V(33) ho	146	18.5705	1.9695	NA
mir164a-4 cuc2-3 C2C2-V(33) ho	146	23.4245	6.94693	7.021
mir164a-4 cuc2-3 C2C2-V(33) ho	154	6.66925	1.41496	NA
mir164a-4 cuc2-3 C2C2-V(33) ho	154	17.378	4.68485	NA
mir164a-4 cuc2-3 C2C2-V(33) ho	182	32.6865	7.5231	14.216
mir164a-4 cuc2-3 C2C2-V(33) ho	182	39.8154	5.95984	4.667
mir164a-4 cuc2-3 C2C2-V(33) ho	182	23.3368	3.39232	4.887
mir164a-4 cuc2-3 C2C2-V(33) ho	182	22.0077	5.67641	6.428
mir164a-4 cuc2-3 C2C2-V(33) ho	206	24.5532	5.38354	5.887
mir164a-4 cuc2-3 C2C2-V(33) ho	206	30.7303	5.15856	11.239
mir164a-4 cuc2-3 C2C2-V(33) ho	227	24.3806	2.2749	11.653
mir164a-4 cuc2-3 C2C2-V(33) ho	227	23.4638	4.35637	24.093
mir164a-4 cuc2-3 C2C2-V(33) ho	251	29.8703	4.77405	15.702
mir164a-4 cuc2-3 C2C2-V(33) ho	251	22.9097	3.95312	19.27
mir164a-4 cuc2-3 C2C2-V(33) ho	342	36.2766	3.98983	49.761
mir164a-4 cuc2-3 C2C2-V(33) ho	342	29.3075	5.27294	27.394
mir164a-4 cuc2-3 C2C2-V(33) ho	346	35.0858	4.22221	46.808
mir164a-4 cuc2-3 C2C2-V(33) ho	392	33.1959	6.05112	59.574
mir164a-4 cuc2-3 C2C2-V(33) ho	392	37.8034	12.4658	39.599
mir164a-4 cuc2-3 C2C2-V(33) ho	393	45.2192	8.38767	54.514
mir164a-4 cuc2-3 C2C2-V(33) ho	423	45.7493	5.74419	56.456
mir164a-4 cuc2-3 C2C2-V(33) ho	449	37.7131	3.72803	58.841
mir164a-4 cuc2-3 C2C2-V(33) ho	449	34.8849	4.34174	56.543
mir164a-4 cuc2-3 C2C2-V(33) ho	475	40.6359	4.2471	65.401
mir164a-4 cuc2-3 C2C2-V(33) ho	475	40.9203	5.66071	72.444
mir164a-4 cuc2-3 C2C2-V(33) ho	533	33.3831	7.43611	71.915
mir164a-4 cuc2-3 C2C2-V(33) ho	533	51.2655	6.73205	78.124
mir164a-4 cuc2-3 C2C2-V(33) ho	578	53.9356	8.22928	105.218
mir164a-4 cuc2-3 C2C2-V(33) ho	578	51.6004	4.76669	89.05
mir164a-4 cuc2-3 C2C2-V(33) ho	579	37.1865	4.14891	89.665
mir164a-4 cuc2-3 C2C2-V(33) ho	579	30.9974	3.94592	97.382
mir164a-4 cuc2-3 C2C2-V(33) ho	582	45.9838	7.43343	77.745
mir164a-4 cuc2-3 C2C2-V(33) ho	582	24.5102	5.66013	124.731
mir164a-4 cuc2-3 C2C2-V(33) ho	611	52.0103	8.96633	91.831
mir164a-4 cuc2-3 C2C2-V(33) ho	683	39.5172	2.6003	126.707
mir164a-4 cuc2-3 C2C2-V(33) ho	683	46.8823	7.42542	103.357
mir164a-4 cuc2-3 C2C2-V(33) ho	722	44.591	5.88996	139.412
mir164a-4 cuc2-3 C2C2-V(33) ho	722	54.5618	6.26665	121.298

## Sheet: FigS4B
Genotype	TimeAfterInduction	BladeLength	Angle
CUC2i	72	353.038	161.837
CUC2i	72	353.038	175.653
CUC2i	72	379.687	157.433
CUC2i	72	436.358	168.814
CUC2i	72	436.358	169.123
CUC2i	72	447.285	164.656
CUC2i	72	455.61	167.578
CUC2i	72	471.232	164.555
CUC2i	72	490.902	169.104
CUC2i	72	600.767	176.96
CUC2i	72	600.767	173.998
CUC2i	72	625.948	169.695
CUC2i	72	625.948	166.311
CUC2i	72	647.492	150.587
CUC2i	72	647.492	171.859
CUC2i	72	662.064	177.469
CUC2i	72	663.618	167.272
CUC2i	72	749.61	164.619
CUC2i	72	749.61	179.274
CUC2i	72	790.139	158.009
CUC2i	72	790.139	162.257
CUC2i	72	893.698	172.372
CUC2i	72	896.93	164.381
CUC2i	72	896.93	171.563
CUC2i	72	910.804	167.615
CUC2i	72	962.574	166.441
CUC2i	72	962.574	173.776
CUC2i	72	1105.38	172.582
CUC2i	72	1247.78	155.348
CUC2i	72	1247.78	172.405
CUC2i	72	1385.19	176.055
CUC2i	72	1385.19	157.286
CUC2i	72	1394.61	163.808
CUC2i	72	1394.61	145.376
CUC2i cuc3-105	72	420.831	178.493
CUC2i cuc3-105	72	420.831	167.651
CUC2i cuc3-105	72	433.15	156.222
CUC2i cuc3-105	72	436.045	167.876
CUC2i cuc3-105	72	446.405	165.729
CUC2i cuc3-105	72	550.748	161.89
CUC2i cuc3-105	72	623.488	171.481
CUC2i cuc3-105	72	677.315	169.695
CUC2i cuc3-105	72	953.184	159.366
CUC2i cuc3-105	72	953.184	176.189
CUC2i	96	357.012	157.263
CUC2i	96	418.103	170.411
CUC2i	96	461.372	164.133
CUC2i	96	500.173	160.791
CUC2i	96	548.44	136.08
CUC2i	96	564.01	160.419
CUC2i	96	564.01	179.91
CUC2i	96	573.878	145.291
CUC2i	96	652.622	150.805
CUC2i	96	652.622	159.528
CUC2i	96	670.984	154.496
CUC2i	96	670.984	168.433
CUC2i	96	693.984	146.614
CUC2i	96	693.984	156.872
CUC2i	96	760.039	172.965
CUC2i	96	760.039	155.313
CUC2i	96	778.326	139.241
CUC2i	96	778.326	177.654
CUC2i	96	781.289	170.008
CUC2i	96	781.289	169.561
CUC2i	96	846.116	148.145
CUC2i	96	879.634	164.899
CUC2i	96	1070.26	142.667
CUC2i	96	1070.26	153.097
CUC2i	96	1079.92	142.922
CUC2i	96	1079.92	165.305
CUC2i	96	1082.34	166.912
CUC2i	96	1082.34	137.49
CUC2i	96	1112.64	145.548
CUC2i	96	1112.64	144.476
CUC2i	96	1124.03	123.69
CUC2i	96	1124.03	147.095
CUC2i	96	1272.64	147.704
CUC2i	96	1272.64	132.633
CUC2i	96	1302.6	174.569
CUC2i	96	1375.91	151.051
CUC2i	96	1375.91	133.735
CUC2i	96	1386.9	130.304
CUC2i	96	1386.9	157.499
CUC2i	96	1451.16	148.627
CUC2i	96	1451.16	128.506
CUC2i	96	1657.34	136.53
CUC2i	96	1657.34	163.028
CUC2i	96	1688.81	125.66
CUC2i	96	1688.81	169.004
CUC2i	96	1864.68	159.36
CUC2i	96	1864.68	133.943
CUC2i	96	2153.43	152.083
CUC2i	96	2160.64	143.477
CUC2i	96	2160.64	161.394
CUC2i	96	2216.03	141.054
CUC2i	96	2216.03	126.87
CUC2i	96	2595.69	161.109
CUC2i	96	2595.69	171.616
CUC2i	96	2846.2	101.991
CUC2i	96	2846.2	129.623
CUC2i	96	3081.46	139.378
CUC2i	96	3081.46	165.774
CUC2i	96	3107.38	117.979
CUC2i cuc3-105	96	427.746	168.296
CUC2i cuc3-105	96	558.757	162.659
CUC2i cuc3-105	96	558.757	173.06
CUC2i cuc3-105	96	671.55	158.625
CUC2i cuc3-105	96	706.909	156.011
CUC2i cuc3-105	96	823.344	166.218
CUC2i cuc3-105	96	880.122	163.063
CUC2i cuc3-105	96	897.976	151.381
CUC2i cuc3-105	96	897.976	162.19
CUC2i cuc3-105	96	953.684	132.817
CUC2i cuc3-105	96	1084.01	140.44
CUC2i cuc3-105	96	1084.01	152.393
CUC2i cuc3-105	96	1508.72	117.329
CUC2i cuc3-105	96	1508.72	157.751
CUC2i cuc3-105	96	1812.06	172.131
CUC2i cuc3-105	96	1848.83	153.02
CUC2i cuc3-105	96	1980.55	163.1
CUC2i cuc3-105	96	1980.55	158.962
CUC2i cuc3-105	96	2308.4	166.824
CUC2i cuc3-105	96	2596.16	139.833
CUC2i cuc3-105	96	2724.29	139.574
CUC2i cuc3-105	96	2776.48	144.462
CUC2i cuc3-105	96	2776.48	109.983
CUC2i	120	564.015	150.005
CUC2i	120	656.289	118.077
CUC2i	120	682.162	124.468
CUC2i	120	682.162	151.144
CUC2i	120	722.915	162.029
CUC2i	120	722.915	148.977
CUC2i	120	745.458	172.66
CUC2i	120	804.136	136.281
CUC2i	120	804.136	128.978
CUC2i	120	804.161	142.209
CUC2i	120	804.161	130.326
CUC2i	120	948.461	134.436
CUC2i	120	950.157	147.476
CUC2i	120	950.157	120.159
CUC2i	120	1017.68	164.895
CUC2i	120	1090.28	120.908
CUC2i	120	1090.28	108.75
CUC2i	120	1251.13	137.462
CUC2i	120	1251.13	145.081
CUC2i	120	1252.03	111.038
CUC2i	120	1252.03	115.259
CUC2i	120	1314.11	147.282
CUC2i	120	1314.11	154.377
CUC2i	120	1335.09	138.858
CUC2i	120	1335.09	154.021
CUC2i	120	1582.67	127.178
CUC2i	120	1582.67	120.259
CUC2i	120	1665.56	131.81
CUC2i	120	1665.56	150.255
CUC2i	120	1769.37	94.206
CUC2i	120	1769.37	115.585
CUC2i	120	1813.32	111.62
CUC2i	120	1813.32	110.742
CUC2i	120	1927.7	137.224
CUC2i	120	1927.7	126.82
CUC2i	120	1962.8	NA
CUC2i	120	1962.8	152.483
CUC2i	120	2193.46	149.638
CUC2i	120	2206.93	103.08
CUC2i	120	2206.93	149.621
CUC2i	120	2296.51	138.691
CUC2i	120	2296.51	122.421
CUC2i	120	2659.53	128.306
CUC2i	120	2821.55	144.926
CUC2i	120	2821.55	101.835
CUC2i	120	2949.14	66.894
CUC2i	120	2949.14	121.781
CUC2i	120	3271.62	93.256
CUC2i	120	3271.62	146.895
CUC2i	120	3377.12	113.047
CUC2i	120	3377.12	95.947
CUC2i cuc3-105	120	714.456	157.834
CUC2i cuc3-105	120	714.456	177.138
CUC2i cuc3-105	120	729.392	165.337
CUC2i cuc3-105	120	729.392	147.807
CUC2i cuc3-105	120	729.886	167.451
CUC2i cuc3-105	120	845.577	163.843
CUC2i cuc3-105	120	905	136.941
CUC2i cuc3-105	120	939.216	85.595
CUC2i cuc3-105	120	996.254	153.321
CUC2i cuc3-105	120	1017.72	119.393
CUC2i cuc3-105	120	1017.72	99.831
CUC2i cuc3-105	120	1044	130.434
CUC2i cuc3-105	120	1051.71	158.242
CUC2i cuc3-105	120	1131.89	130.251
CUC2i cuc3-105	120	1131.89	140.906
CUC2i cuc3-105	120	1141.09	112.807
CUC2i cuc3-105	120	1224.69	167.905
CUC2i cuc3-105	120	1224.69	167.976
CUC2i cuc3-105	120	1285.2	129.923
CUC2i cuc3-105	120	1322.32	126.527
CUC2i cuc3-105	120	1322.32	150.647
CUC2i cuc3-105	120	1365.48	133.603
CUC2i cuc3-105	120	1835.11	144.356
CUC2i cuc3-105	120	2136.05	129.949
CUC2i cuc3-105	120	2136.05	141.727
CUC2i cuc3-105	120	2309.48	153.933
CUC2i cuc3-105	120	2309.48	152.258
CUC2i cuc3-105	120	2606.11	167.435
CUC2i cuc3-105	120	2649.69	150.255
CUC2i cuc3-105	120	2956.13	116.323
CUC2i cuc3-105	120	2956.13	126.87
CUC2i cuc3-105	120	2969.69	96.472
CUC2i cuc3-105	120	3219.33	142.125
CUC2i	144	734.277	126.364
CUC2i	144	766.148	153.102
CUC2i	144	820.066	148.908
CUC2i	144	820.066	132.101
CUC2i	144	871.891	141.39
CUC2i	144	871.891	146.417
CUC2i	144	929.991	135.945
CUC2i	144	929.991	125.34
CUC2i	144	1099.09	144.036
CUC2i	144	1099.09	86.032
CUC2i	144	1157.18	130.65
CUC2i	144	1157.18	164.208
CUC2i	144	1230	130.017
CUC2i	144	1230	115.712
CUC2i	144	1235.08	137.01
CUC2i	144	1235.08	118.174
CUC2i	144	1381.1	124.943
CUC2i	144	1381.1	116.364
CUC2i	144	1394.29	113.625
CUC2i	144	1394.29	116.844
CUC2i	144	1597.44	135.414
CUC2i	144	1597.44	109.455
CUC2i	144	1598.98	134.215
CUC2i	144	1598.98	154.44
CUC2i	144	1693.22	116.819
CUC2i	144	1693.22	58.761
CUC2i	144	1852.87	118.461
CUC2i	144	1852.87	136.59
CUC2i	144	1908.03	132.064
CUC2i	144	1908.03	96.34
CUC2i	144	2053.13	118.708
CUC2i	144	2053.13	127.561
CUC2i	144	2244.04	140.194
CUC2i	144	2244.04	147.456
CUC2i	144	2356.12	124.962
CUC2i	144	2356.12	119.687
CUC2i	144	2383.3	122.326
CUC2i	144	2395.82	107.809
CUC2i	144	2395.82	138.49
CUC2i	144	2528.41	103.446
CUC2i	144	2598.54	134.195
CUC2i	144	2598.54	85.223
CUC2i	144	2906.72	117.507
CUC2i	144	2906.72	115.787
CUC2i	144	3063.71	96.116
CUC2i	144	3063.71	87.852
CUC2i	144	3256.3	100.153
CUC2i	144	3256.3	118.282
CUC2i	144	3285.77	69.203
CUC2i	144	3285.77	125.902
CUC2i	144	3403.86	99.462
CUC2i	144	3403.86	126.644
CUC2i	144	3542.09	99.613
CUC2i	144	3542.09	139.268
CUC2i	144	3664.87	115.102
CUC2i	144	3664.87	133.311
CUC2i	144	4406.48	94.918
CUC2i	144	4406.48	104.861
CUC2i	144	4550.98	106.639
CUC2i	144	4550.98	144.254
CUC2i	144	4611.64	141.566
CUC2i	144	4816.25	75.964
CUC2i	144	4816.25	105.197
CUC2i	144	5088.39	154.386
CUC2i	144	5088.39	138.564
CUC2i	144	5684.9	58.392
CUC2i	144	6703.18	151.547
CUC2i cuc3-105	144	784.448	127.112
CUC2i cuc3-105	144	798.288	175.732
CUC2i cuc3-105	144	1046.66	150.461
CUC2i cuc3-105	144	1068.22	170.598
CUC2i cuc3-105	144	1068.22	165.486
CUC2i cuc3-105	144	1083.84	160.896
CUC2i cuc3-105	144	1199.95	121.333
CUC2i cuc3-105	144	1221.69	144.162
CUC2i cuc3-105	144	1458.3	140.906
CUC2i cuc3-105	144	1491.48	119.103
CUC2i cuc3-105	144	1491.48	153.435
CUC2i cuc3-105	144	1538.95	146.05
CUC2i cuc3-105	144	1586.16	150.542
CUC2i cuc3-105	144	1773.66	125.745
CUC2i cuc3-105	144	1773.66	146.889
CUC2i cuc3-105	144	1819.24	146.915
CUC2i cuc3-105	144	1819.24	132.049
CUC2i cuc3-105	144	1854.35	141.221
CUC2i cuc3-105	144	1854.35	139.574
CUC2i cuc3-105	144	1967.32	131.295
CUC2i cuc3-105	144	1967.32	112.475
CUC2i cuc3-105	144	2117.11	123.797
CUC2i cuc3-105	144	2273.48	105.698
CUC2i cuc3-105	144	2273.48	139.399
CUC2i cuc3-105	144	2277.43	150.682
CUC2i cuc3-105	144	2300.51	44.817
CUC2i cuc3-105	144	2300.51	135.73
CUC2i cuc3-105	144	2392.12	158.286
CUC2i cuc3-105	144	2392.12	168.69
CUC2i cuc3-105	144	2403.16	137.278
CUC2i cuc3-105	144	2403.16	177.542
CUC2i cuc3-105	144	2682.97	70.877
CUC2i cuc3-105	144	2746.37	137.303
CUC2i cuc3-105	144	2746.37	126.563
CUC2i cuc3-105	144	2822.77	170.406
CUC2i cuc3-105	144	3044.76	138.358
CUC2i cuc3-105	144	3055.97	110.236
CUC2i cuc3-105	144	3055.97	164.304
CUC2i cuc3-105	144	3109.3	162.836
CUC2i cuc3-105	144	3393.16	156.038
CUC2i cuc3-105	144	3393.16	123.089
CUC2i cuc3-105	144	4105.15	156.153
CUC2i cuc3-105	144	4105.15	159.057
CUC2i cuc3-105	144	4223.85	150.945
CUC2i cuc3-105	144	4692.59	151.672
CUC2i cuc3-105	144	4692.59	146.441
CUC2i cuc3-105	144	5123.22	159.391
CUC2i cuc3-105	144	5123.22	144.221
CUC2i	168	1202.63	135.878
CUC2i	168	1237.6	133.295
CUC2i	168	1386.63	134.423
CUC2i	168	1558.42	157.62
CUC2i	168	1558.42	135.787
CUC2i	168	1657.4	126.924
CUC2i	168	1657.4	132.387
CUC2i	168	1888.95	135.716
CUC2i	168	1888.95	126.992
CUC2i	168	1889.18	133.714
CUC2i	168	1907.96	152.562
CUC2i	168	1907.96	144.636
CUC2i	168	1980.72	83.491
CUC2i	168	2129.47	112.683
CUC2i	168	2129.47	141.601
CUC2i	168	2237.07	130.496
CUC2i	168	2237.07	172.294
CUC2i	168	2366.34	130.308
CUC2i	168	2541.83	126.223
CUC2i	168	2541.83	114.075
CUC2i	168	2596.16	122.562
CUC2i	168	2596.16	156.551
CUC2i	168	2619.18	131.379
CUC2i	168	2619.18	139.79
CUC2i	168	2737.26	108.792
CUC2i	168	2737.26	145.033
CUC2i	168	2988.27	89.157
CUC2i	168	3067.25	145.149
CUC2i	168	3067.25	136.583
CUC2i	168	3268.81	112.704
CUC2i	168	3268.81	140.194
CUC2i	168	3382.68	143.616
CUC2i	168	3382.68	141.911
CUC2i	168	3687.53	143.233
CUC2i	168	3687.53	119.233
CUC2i	168	3927.18	171.924
CUC2i	168	3927.18	141.268
CUC2i	168	4048.47	112.616
CUC2i	168	4358.55	154.871
CUC2i	168	4358.55	146.43
CUC2i	168	4368.18	141.863
CUC2i	168	4368.18	140.821
CUC2i	168	4444.37	122.094
CUC2i	168	4444.37	107.639
CUC2i	168	4540.92	115.064
CUC2i	168	4540.92	132.963
CUC2i	168	5145.79	131.194
CUC2i	168	5145.79	142.961
CUC2i	168	5240.62	99.896
CUC2i	168	5240.62	117.728
CUC2i	168	5754.33	135
CUC2i	168	5763.41	151.96
CUC2i	168	5763.41	111.463
CUC2i	168	6298.35	115.866
CUC2i	168	6298.35	91.73
CUC2i	168	6700.81	92.121
CUC2i	168	6700.81	156.422
CUC2i	168	7066.57	140.821
CUC2i	168	7066.57	130.553
CUC2i	168	7218.9	123.28
CUC2i	168	7476.84	133.112
CUC2i	168	8017.3	113.884
CUC2i	168	8017.3	142.125
CUC2i	168	8707.51	104.843
CUC2i cuc3-105	168	1266.15	140.906
CUC2i cuc3-105	168	1622.91	119.411
CUC2i cuc3-105	168	1640.8	138.16
CUC2i cuc3-105	168	1701.49	118.51
CUC2i cuc3-105	168	1701.49	100.117
CUC2i cuc3-105	168	1769.87	154.654
CUC2i cuc3-105	168	1880.68	114.039
CUC2i cuc3-105	168	1880.68	114.682
CUC2i cuc3-105	168	1988.75	140.117
CUC2i cuc3-105	168	1988.75	156.746
CUC2i cuc3-105	168	2052.42	153.384
CUC2i cuc3-105	168	2052.42	159.812
CUC2i cuc3-105	168	2068.55	137.649
CUC2i cuc3-105	168	2068.55	129.289
CUC2i cuc3-105	168	2361	134.714
CUC2i cuc3-105	168	2361	157.434
CUC2i cuc3-105	168	2516.8	138.406
CUC2i cuc3-105	168	2591.97	125.061
CUC2i cuc3-105	168	3077.63	125.151
CUC2i cuc3-105	168	3237.28	134.813
CUC2i cuc3-105	168	3237.28	98.017
CUC2i cuc3-105	168	3576.25	126.514
CUC2i cuc3-105	168	3758.08	124.105
CUC2i cuc3-105	168	3758.08	158.423
CUC2i cuc3-105	168	4083.65	159.624
CUC2i cuc3-105	168	4083.65	143.664
CUC2i cuc3-105	168	4084.67	133.403
CUC2i cuc3-105	168	4084.67	163.072
CUC2i cuc3-105	168	4137.18	155.996
CUC2i cuc3-105	168	4137.18	149.349
CUC2i cuc3-105	168	4364.68	137.516
CUC2i cuc3-105	168	4364.68	165.256
CUC2i cuc3-105	168	4392.56	165.697
CUC2i cuc3-105	168	4484.06	101.125
CUC2i cuc3-105	168	4484.06	58.517
CUC2i cuc3-105	168	4923.3	133.781
CUC2i cuc3-105	168	4923.3	147.958
CUC2i cuc3-105	168	5019.23	159.274
CUC2i cuc3-105	168	5133.64	142.66
CUC2i cuc3-105	168	5133.64	123.051
CUC2i cuc3-105	168	5692.51	113.003
CUC2i cuc3-105	168	5692.51	66.371
CUC2i cuc3-105	168	7771.68	159.444
CUC2i cuc3-105	168	7771.68	162.209

## Sheet: FigS4C
LeafLength	Genotype	CUC2PromoterActivity	CUC3PromoterActivity
253	Col0	0.511783	0.407525
253	Col0	0.453146	0.341557
256	Col0	0.15642	0.209167
256	Col0	0.252607	0.324957
344	Col0	0.446806	0.329405
344	Col0	0.25144	0.192624
296	Col0	0.284329	0.266712
296	Col0	0.0230325	0.0179222
391	Col0	0.309402	0.245105
391	Col0	0.557846	0.462337
171	Col0	0.081343	0.0824792
288	Col0	0.453278	0.317805
288	Col0	0.0621123	0.0571668
257	Col0	0.573052	0.348085
257	Col0	0.180238	0.204828
196	Col0	0.650986	0.409399
196	Col0	0.0772146	0.0293926
305	Col0	0.414195	0.237316
305	Col0	1.44667	0.637824
229	Col0	0.456065	0.444355
229	Col0	0.197486	0.22357
228	Col0	0.262772	0.248049
228	Col0	0.113221	0.0923103
381	Col0	0.474579	0.347077
381	Col0	0.262557	0.248681
302	Col0	0.177138	0.187635
302	Col0	0.355872	0.31723
625	Col0	0.0572209	0.0521801
625	Col0	0.625541	0.439491
601	Col0	1.32149	0.950385
378	Col0	0.487761	0.392487
378	Col0	0.581073	0.511106
481	Col0	1.28944	0.77421
481	Col0	0.58407	0.43296
419	Col0	0.634457	0.546775
419	Col0	0.780483	0.671349
651	Col0	0.46953	0.295152
651	Col0	0.343942	0.225964
416	Col0	0.349071	0.297182
416	Col0	0.480409	0.357466
358	Col0	1.3473	0.769373
358	Col0	0.752304	0.516311
666	Col0	1.32383	0.746218
675	Col0	0.464198	0.345873
499	Col0	1.25716	0.497961
662	Col0	0.750879	0.473706
662	Col0	1.45598	0.808757
717	Col0	0.789647	0.511428
518	Col0	1.12472	0.623885
467	Col0	0.57993	0.368054
467	Col0	0.61985	0.478424
807	Col0	0.603317	0.33369
470	Col0	0.498082	0.310253
470	Col0	0.391277	0.20963
604	Col0	0.605003	0.41495
709	Col0	0.26934	0.182857
772	Col0	0.473655	0.314961
854	Col0	0.516547	0.259246
774	Col0	1.62315	0.630683
604	Col0	1.38599	0.908412
604	Col0	0.962948	0.539095
615	Col0	1.65412	0.60751
645	Col0	0.589666	0.376809
598	Col0	1.01988	0.367815
750	Col0	0.249587	0.143386
627	Col0	0.742413	0.486094
851	Col0	0.312568	0.195699
851	Col0	0.481984	0.304547
873	Col0	0.324518	0.142786
855	Col0	0.727615	0.343727
431	Col0	1.26122	0.55221
431	Col0	0.9572	0.567812
356	Col0	0.906658	0.573006
356	Col0	0.764979	0.503494
481	Col0	0.551337	0.272599
481	Col0	0.847483	0.585984
493	Col0	0.758033	0.543063
493	Col0	1.00743	0.692196
464	Col0	0.647312	0.405755
358	Col0	1.67117	0.778796
528	Col0	1.30216	0.609753
528	Col0	0.887772	0.578782
618	Col0	0.841208	0.537527
618	Col0	1.12963	0.626553
290	Col0	0.752187	0.54182
290	Col0	0.762625	0.472278
236	Col0	0.54317	0.348455
236	Col0	1.08203	0.513007
645	Col0	1.62705	0.78367
505	Col0	0.734358	0.529429
505	Col0	0.985132	0.481194
473	Col0	1.73044	0.949508
473	Col0	2.11763	1.17852
721	Col0	0.169139	0.142988
721	Col0	0.344747	0.244134
738	Col0	1.57937	0.540992
738	Col0	1.8835	0.653314
528	Col0	0.389376	0.21683
528	Col0	0.309034	0.256246
675	Col0	0.59118	0.291804
675	Col0	0.92459	0.442392
571	Col0	0.556287	0.277539
547	Col0	1.56921	0.65657
709	Col0	0.726729	0.481
709	Col0	0.893486	0.390852
775	Col0	0.751973	0.46699
775	Col0	1.06079	0.568275
616	Col0	0.798556	0.546305
616	Col0	1.04303	0.53066
799	Col0	0.336278	0.257822
722	Col0	0.771292	0.335098
891	Col0	0.708968	0.336849

## Sheet: FigS4D
CUC3PromoterActivity	LeafLength	Genotype
0.525041	590	Col-0
0.333912	590	Col-0
0.651683	510	Col-0
0.602767	510	Col-0
1.04466	445	Col-0
1.06574	445	Col-0
1.1925	544	Col-0
0.813149	544	Col-0
1.24478	428	CUC2g-m4
1.43644	428	CUC2g-m4
1.49537	420	CUC2g-m4
1.46165	420	CUC2g-m4
1.39454	402	CUC2g-m4
1.44845	402	CUC2g-m4
1.82656	488	CUC2g-m4
1.67861	488	CUC2g-m4
1.60131	502	CUC2g-m4
1.45973	502	CUC2g-m4
1.46568	428	CUC2g-m4
1.56735	428	CUC2g-m4
1.48175	552	CUC2g-m4
1.65395	552	CUC2g-m4
0.327245	558	Col-0
0.422142	558	Col-0
2.23836	415	ago1-27
2.29278	415	ago1-27
2.27448	447	ago1-27
1.86288	447	ago1-27
2.14363	487	ago1-27
2.14076	487	ago1-27
2.0996	511	ago1-27
2.40155	511	ago1-27
1.12857	487	mir164a-4
1.12476	487	mir164a-4
1.6378	486	mir164a-4
1.55886	486	mir164a-4
1.45168	576	mir164a-4
1.31	576	mir164a-4
2.06606	445	mir164a-4
1.57095	445	mir164a-4
1.41834	523	ago1-27
1.35011	523	ago1-27
1.94188	597	ago1-27
1.89861	597	ago1-27
1.92613	570	ago1-27
1.79129	570	ago1-27
2.02609	476	ago1-27
2.06815	476	ago1-27
1.65749	524	ago1-27
1.5747	524	ago1-27
2.11588	414	ago1-27
1.69871	414	ago1-27
1.56411	544	ago1-27
2.39451	544	ago1-27
1.91577	482	ago1-27
1.23574	482	ago1-27
2.22124	406	ago1-27
1.80713	406	ago1-27
1.88895	468	ago1-27
1.99723	409	ago1-27
1.81611	409	ago1-27
1.67762	415	ago1-27
1.84292	415	ago1-27
1.19299	584	Col-0
1.24165	584	Col-0

[truncated: 9 more sheets: FigS4E, FigS5C, FigS5F, FigS5H, FigS5IK, FigS5JL, FigS6B, FigS6C, FigS6D]
